1 **Environmental DNA metabarcoding of rivers: Not all eDNA is**  
2 **everywhere, and not all the time**

3

4 Jan-Niklas Macher<sup>1,2</sup> and Florian Leese<sup>1,2</sup>

5

6 <sup>1</sup>*Aquatic Ecosystem Research, Faculty of Biology, University of Duisburg-Essen, Universitätsstraße*  
7 *5, 45141 Essen, Germany*

8 <sup>2</sup>*Centre for Water and Environmental Research, University of Duisburg-Essen, Universitätsstraße 2,*  
9 *45141 Essen, Germany*

10

11 JNM: [jan.macher@uni-due.de](mailto:jan.macher@uni-due.de), +49.201.183-6710

12 FL: [florian.leese@uni-due.de](mailto:florian.leese@uni-due.de), +49.201.183-4053

13

14

15

16

17

18

19

20

21

22

23

24

25

26

27

28

29

30

31

32

33

34

35

36

37

38

39

40

41

42

43

44

45 **Abstract**

46 Environmental DNA metabarcoding has become a popular tool for the assessment of freshwater  
47 biodiversity, but it is largely unclear how sampling time and location influence the assessment of  
48 communities. Abiotic factors in rivers can change on small spatial and temporal scale and might  
49 greatly influence eDNA metabarcoding results. In this study, we sampled three German rivers at four  
50 locations per sampling site: 1. Left river side, surface water 2. Right river side, surface water, 3. Left  
51 side, close to the riverbed, 4. Right side, close to the riverbed. For the rivers Ruhr and Möhne,  
52 sampling was conducted three times in spring, each sampling one week apart. The Ruhr was again  
53 sampled in autumn and the Gillbach was sampled in winter. Sequencing on an Illumina MiSeq with  
54 COI primers Bf2/BR2 revealed diverse communities (6493 Operational taxonomic units, OTUs), which  
55 largely differed between rivers. Communities changed significantly over time in the Ruhr, but not in  
56 the Möhne. Sampling location influenced recovered communities in the Möhne and in the Ruhr in  
57 autumn. Our results have important implications for future eDNA studies, which should take into  
58 account that not all eDNA in rivers is everywhere and not at all times.

59  
60  
61  
62  
63  
64  
65  
66  
67  
68  
69  
70  
71  
72  
73  
74  
75  
76  
77  
78  
79  
80  
81  
82  
83  
84  
85  
86

## 87 **Introduction**

88

89 Worldwide, a threatening loss of biodiversity and ecosystem functions connected to rivers is observed  
90 and large-scale assessments of biodiversity are urgently needed to monitor this loss<sup>1</sup>. For that  
91 purpose, environmental DNA metabarcoding is especially promising. Environmental DNA (eDNA)  
92 metabarcoding means that DNA is extracted from soil, air or water and millions of sequences of a  
93 genetic marker are amplified and sequenced, allowing to assess a large part of an ecosystem's  
94 biodiversity<sup>2</sup>. Recent findings show that environmental DNA metabarcoding can be used to assess  
95 whole river catchment biodiversity<sup>3</sup>, which is especially promising for large-scale studies. At the  
96 moment, freshwater monitoring programs largely rely on the sampling and morphological identification  
97 of invertebrate taxa, which can be error-prone<sup>4</sup> and miss out on ecological differences between  
98 closely related species<sup>5</sup>. While whole community assessments of freshwater ecosystems using  
99 environmental DNA metabarcoding are still not common, they have been shown to be a potentially  
100 powerful tool<sup>3,6,7</sup>, which might greatly improve speed and accuracy of biodiversity assessments.  
101 However, the technique suffers from several potential drawbacks, which might hamper its usability.  
102 While tests have been conducted on the power of eDNA metabarcoding for the detection of species<sup>8</sup>,  
103 degradation speed of environmental DNA<sup>9</sup>, filtration<sup>10</sup> and DNA extraction methods<sup>11</sup>, temporal  
104 patterns of eDNA occurrence<sup>6</sup>, very few studies have looked at spatial distribution of environmental  
105 DNA, especially in rivers. Studies have assessed communities recovered from eDNA samples in  
106 different stream habitats<sup>12</sup>, have shown that sediments function as a depots for DNA<sup>13</sup> and that  
107 transport of eDNA in rivers depends on several factor such as retention and resuspension<sup>14</sup>. To date,  
108 however, many questions regarding eDNA transport, spatial resolution and reliability of results are still  
109 not resolved<sup>15</sup>. The question if and how eDNA is distributed in the water column of rivers on a very  
110 small scale has not been addressed. It is often assumed that at least in shallow rivers, most eDNA is  
111 everywhere due to the relatively turbulent water movement, which will disperse DNA in the water.  
112 However, rivers are very heterogeneous environments with a multitude of microhabitats, which can  
113 harbour highly different species communities on a small spatial scale<sup>16</sup>. If eDNA is to be used in  
114 biodiversity assessments of rivers, it needs to be clarified whether all eDNA is indeed everywhere at  
115 all times and if it is homogeneously distributed in the water column. If this is the case, sampling would  
116 be greatly simplified, as taking a water sample at any point in the stream would be sufficient for  
117 reliable biodiversity assessments. If differences on small spatial and temporal scale are found,

118 however, this needs to be taken into account in future studies using environmental DNA, as even  
119 slightly shifted sampling times and locations could lead to different assessment results, subsequently  
120 biasing conclusions based on these findings.

121 In this study, we assessed the impact of sampling time and sampling location at a given sampling site  
122 on community composition recovered through eDNA metabarcoding. We sampled three rivers at four  
123 locations each and sequenced a 421 bp region of the standard animal barcoding gene COI using  
124 highly degenerate primers. We sampled surface water on the left and right side of the rivers and also  
125 took water samples directly beneath these surface sampling locations, close to the riverbed. Two  
126 rivers were sampled three times in spring, with each sampling one week apart, one of these rivers  
127 was sampled a fourth time five month later and one river was sampled once in winter. We hypothesise  
128 1) that community composition inferred through eDNA metabarcoding strongly differs between rivers,  
129 even those of the same stream type and and in close proximity to each other  
130 2) that community composition inferred through eDNA metabarcoding changes over the course of one  
131 week in rivers and  
132 3) that community composition inferred from eDNA metabarcoding differs between different locations  
133 at a sampling site on a small scale, meaning that environmental DNA is not evenly distributed in the  
134 water columns of rivers.

135

136

## 137 **Results**

138

### 139 **Discovered biodiversity**

140 26,142,204 raw reads were obtained (MiSeq run 1: 16,005,709 MiSeq run 1, MiSeq run 2:  
141 10,136,495). A total of 8,939,194 reads remained after initial quality filtering and 14,127 OTUs were  
142 retained. 1607 reads (0.018 % of reads) were found in negative control samples. This a commonly  
143 found read number due to tag switching that occurs during Illumina sequencing and thus, no  
144 contamination was suspected. After further quality filtering, i.e. retaining only OTUs present in both  
145 replicates per sample, 6493 OTUs (47.8%) were retained (read number per replicate: Supplementary  
146 table 1). On kingdom level (NCBI taxonomy), 39% of all OTUs from the Gillbach could be assigned to  
147 a taxonomic name, 43% of OTUs from the Möhne, 39% of OTUs from the Ruhr spring samples and  
148 47% of the OTUs found in the Ruhr autumn samples. A large number of identified OTUs were  
149 Stramenopiles (Gillbach: 42%, Figure 1 a; Möhne: 54%, Figure 1 b; Ruhr (spring): 49%, Figure 1 c;



150 Ruhr (autumn): 52%, Figure 1 d). Metazoa were the second largest group with 16% of OTUs in the  
151 Gillbach, 18% in the Möhne, 17% in the Ruhr in spring and 17% in the Ruhr in autumn. (Detailed list:  
152 Supplementary table 2). When using a strict threshold (~97% identity to reference sequences), 155  
153 metazoan OTUs and 67 Stramenopiles were retained for further analyses (full OTU table:  
154 Supplementary table 3). In total, 42 metazoan orders were found. Diptera contributed most of the  
155 metazoan OTUs (21.3%), followed by Haptotaxida (11.6%), and Trichoptera (9.7%) (detailed list:  
156 Supplementary table 4). The identified Stramenopiles fell into 15 orders, with the majority of taxa  
157 being Oomycota (31.3 % Pythiales, 23.9% Peronosporales) (detailed list: Supplementary table 5).

158

### 159 **Differences in community composition between rivers**

160 Results for the datasets used for comparing community composition in different rivers can be found in  
161 table 1. Here, only PERMANOVA results with  $R^2 > 0.09$  and  $p < 0.05$  are further described. Sampled  
162 rivers strongly differed with regards to community composition (All OTUs:  $R^2 = 0.55$ ,  $p = 0.001$ ;  
163 Metazoa:  $R^2 = 0.43$ ,  $p = 0.001$ ; Stramenopiles:  $R^2 = 0.56$ ,  $p = 0.001$ ), which is also shown by NMDS plots  
164 (All OTUs: Figure 2 a; Metazoa: Figure 2 b; Stramenopiles: Figure 2 c)

165

166 **Table 1:** Results of PERMANOVAs ( $R^2$  effect sizes and significance) inferred through eDNA  
167 metabarcoding of the rivers Ruhr, Möhne and Gillbach for all OTUs, metazoan OTUs and  
168 stramenopile OTUs.

| <b>Dataset</b>       | <b>Differences between communities in Ruhr, Möhne and Gillbach</b> |
|----------------------|--------------------------------------------------------------------|
| <b>All OTUs</b>      | $R^2 = 0.55$ , $p = 0.001$                                         |
| <b>Metazoa</b>       | $R^2 = 0.43$ , $p = 0.001$                                         |
| <b>Stramenopiles</b> | $R^2 = 0.56$ , $p = 0.001$                                         |

169

### 170 **Influence of sampling time on communities inferred through eDNA metabarcoding**

171 Results of all PERMANOVAs for the datasets comparing community composition at different sampling  
172 times can be found in table 2. Sampling time was found to strongly influence community composition  
173 of all OTUs ( $R^2 = 0.35$ ,  $p = 0.001$ ), Metazoa ( $R^2 = 0.26$ ,  $p = 0.001$ ) and Stramenopiles ( $R^2 = 0.34$ ,  $p = 0.001$ )  
174 in the Ruhr (spring + autumn). The same was found when only the spring samples were analysed (All  
175 OTUs:  $R^2 = 0.31$ ,  $p = 0.003$ , NMDS: Figure 3a; Metazoa:  $R^2 = 0.39$ ,  $p = 0.001$ , NMDS: Figure 3b;

176 Stramenopiles:  $R^2=0.27$ ,  $p=0.031$ , NMDS: Figure 3c). For the Möhne samples, which were taken at  
 177 the same time as the Ruhr spring samples, sampling time did not significantly influence community  
 178 composition (All OTUs:  $R^2=0.08$ ,  $p=0.831$ , NMDS: Figure 3d; Metazoa:  $R^2=0.07$ ,  $p=0.72$ , NMDS:  
 179 Figure 3e; Stramenopiles:  $R^2=0.11$ ,  $p=0.339$ , NMDS: Figure 3f).

180

181 **Table 2:** Results of the PERMANOVAs ( $R^2$  effect sizes and significance) describing the impact of  
 182 sampling time on community composition in the Ruhr (spring + autumn; spring only) and the Möhne  
 183 datasets for all OTUs, Metazoa and Stramenopiles.

| All OTUs             | Differences between communities found in spring week 1, 2 and 3 |
|----------------------|-----------------------------------------------------------------|
| <b>Ruhr Complete</b> | $R^2=0.35$ , $p=0.001$                                          |
| <b>Ruhr: spring</b>  | $R^2:0.31$ , $p= 0.003$                                         |
| <b>Möhne: spring</b> | $R^2:0.08$ , $p=0.831$                                          |
| <b>Metazoa</b>       |                                                                 |
| <b>Ruhr Complete</b> | $R^2=0.26$ , $p=0.001$                                          |
| <b>Ruhr: spring</b>  | $R^2=0.39$ , $p= 0.001$                                         |
| <b>Möhne: spring</b> | $R^2=0.07$ , $p= 0.72$                                          |
| <b>Stramenopiles</b> |                                                                 |
| <b>Ruhr Complete</b> | $R^2=0.34$ , $p= 0.001$                                         |
| <b>Ruhr: spring</b>  | $R^2=0.27$ , $p= 0.031$                                         |
| <b>Möhne: spring</b> | $R^2=0.11$ , $p= 0.339$                                         |

184

### 185 Influence of sampling location on communities inferred through eDNA metabarcoding

186 All results of the PERMANOVAs for the datasets comparing community composition at different  
 187 sampling locations can be found in table 3. Sampling location did not explain a significant proportion  
 188 of the community composition in the Ruhr in spring (NMDS: Figure 4a, 4b, 4c) and autumn. Three  
 189 samples were taken per sampling location in the Ruhr in autumn. Results show that these replicates  
 190 do not always cluster closest together for all sampling locations (Supplementary Figure 1). However in  
 191 autumn, community composition of all OTUs in the surface water of the Ruhr differed moderately from  
 192 community composition found in the water sampled close to the riverbed ( $R^2=0.13$ ,  $p=0.039$ ), which  
 193 was also found for Metazoa ( $R^2=0.16$ ,  $p=0.009$ ), but not for Stramenopiles ( $R^2=0.11$ ,  $p=0.285$ ).  
 194 Community composition in samples from left and right side of the Ruhr did not differ in autumn.

195 For the Möhne samples, sampling location explained a large fraction of the variance in community  
 196 composition of all OTUs ( $R^2=0.36$ ,  $p=0.003$ , NMDS: Figure 4d), but not that of Metazoa ( $R^2=0.31$ ,  
 197  $p=0.205$ , NMDS: Figure 4e) and Stramenopiles ( $R^2=0.33$ ,  $p=0.281$ , NMDS: Figure 4f). Community  
 198 composition found in surface water of the Möhne differed from that found in riverbed water only for  
 199 metazoan OTUs ( $R^2=0.18$ ,  $p=0.013$ ). No significant differences were found between communities  
 200 found in samples taken from the left and the right side of the stream.

201

202 **Table 3:** Results of the PERMANOVAs ( $R^2$  effect sizes and significance) describing the impact of  
 203 sampling location on community composition in the Ruhr (spring + autumn; spring only; autumn only)  
 204 and the Möhne datasets for all OTUs, Metazoa and Stramenopiles.

| All OTUs             | Sampling location      | Surface vs. riverbed   | Left side vs. right side |
|----------------------|------------------------|------------------------|--------------------------|
| <b>Ruhr Complete</b> | $R^2=0.06$ , $p=0.983$ | $R^2=0.02$ , $p=0.824$ | $R^2=0.07$ , $p=0.181$   |
| <b>Ruhr: spring</b>  | $R^2=0.17$ , $p=0.956$ | $R^2=0.05$ , $p=0.949$ | $R^2=0.06$ , $p=0.604$   |
| <b>Ruhr: autumn</b>  | $R^2=0.31$ , $p=0.12$  | $R^2=0.13$ , $p=0.039$ | $R^2=0.09$ , $p=0.411$   |
| <b>Möhne:spring</b>  | $R^2=0.36$ , $p=0.003$ | $R^2=0.11$ , $p=0.127$ | $R^2=0.11$ , $p=0.138$   |
| <b>Metazoa</b>       |                        |                        |                          |
| <b>Ruhr Complete</b> | $R^2=0.06$ , $p=0.984$ | $R^2=0.02$ , $p=0.891$ | $R^2=0.09$ , $p=0.058$   |
| <b>Ruhr: spring</b>  | $R^2=0.13$ , $p=0.986$ | $R^2=0.03$ , $p=0.951$ | $R^2=0.06$ , $p=0.714$   |
| <b>Ruhr: autumn</b>  | $R^2=0.35$ , $p=0.041$ | $R^2=0.16$ , $p=0.009$ | $R^2=0.11$ , $p=0.218$   |
| <b>Möhne: spring</b> | $R^2=0.31$ , $p=0.205$ | $R^2=0.18$ , $p=0.013$ | $R^2=0.07$ , $p=0.768$   |
| <b>Stramenopiles</b> |                        |                        |                          |
| <b>Ruhr Complete</b> | $R^2=0.06$ , $p=0.912$ | $R^2=0.03$ , $p=0.533$ | $R^2=0.07$ , $p=0.169$   |
| <b>Ruhr: spring</b>  | $R^2=0.24$ , $p=0.604$ | $R^2=0.14$ , $p=0.179$ | $R^2=0.05$ , $p=0.677$   |
| <b>Ruhr: autumn</b>  | $R^2=0.28$ , $p=0.434$ | $R^2=0.11$ , $p=0.285$ | $R^2=0.1$ , $p=0.371$    |
| <b>Möhne: spring</b> | $R^2=0.33$ 0.281       | $R^2=0.1$ 0.379        | $R^2=0.07$ , $p=0.542$   |

205

206

## 207 **Discussion**

208

209 In this study, we investigated how time and sampling location influence community composition  
210 inferred through environmental DNA metabarcoding of rivers. We sampled three shallow rivers at four  
211 locations in close proximity to each other and two of these rivers were sampled at several points in  
212 time. We could show that not all environmental DNA in rivers is everywhere, and not all the time, even  
213 on a very small spatial scale.

214 We hypothesised that communities from different rivers, even those in close proximity to each other,  
215 significantly differ when inferred through eDNA metabarcoding. We could clearly show that this is true  
216 even for biocoenotically similar rivers like the Ruhr and Möhne, which are in close proximity (<10km)  
217 to each other. This finding shows the potential of the eDNA metabarcoding technique as a potential  
218 tool for 'fingerprinting' rivers and its potential to be used as a tool in routine monitoring, for which it has  
219 been proposed before<sup>3</sup>. Previous studies have shown that eDNA is capable of recovering differences  
220 in community composition between habitats<sup>17,18</sup> and that communities in single locations change over  
221 time<sup>6</sup>. Due to the large amount of OTUs obtained (here: 6493), it can be expected that even minor  
222 changes in community composition of a river can be easily detected and used to quantify  
223 environmental changes of both natural (e.g. seasonal) and anthropogenic (e.g. chemical pollution)  
224 origin. However, the limited number of rivers included in our study does not allow to draw the definite  
225 conclusion that 'fingerprinting' rivers is possible, and further studies including a large number of rivers  
226 sampled at different points in time and at different sites are needed to answer the question if 'stream  
227 fingerprinting' by eDNA metabarcoding is possible and reliable.

228 Second, we hypothesised that community composition in rivers inferred through eDNA metabarcoding  
229 changes over time, as has been shown for invertebrates in lakes<sup>6</sup> and fish in estuaries<sup>18</sup>. Although the  
230 fact that communities change over time due to biotic (presence of species) and abiotic factors (e.g.  
231 flow and water temperature) is known<sup>19</sup>, our study is the first to study this pattern in different rivers on  
232 a small temporal scale using eDNA and primers that target a wide range of taxa instead of selected  
233 taxonomic groups. We found different temporal patterns in the rivers Ruhr and Möhne: In the Ruhr,  
234 community composition of all OTUs, metazoan OTUs, and stramenopile OTUs changed from spring  
235 to autumn, which complements previous studies on community change driven by seasonality<sup>6</sup>.  
236 However, community composition in the Ruhr also significantly changed within two weeks in spring for  
237 all OTUs, metazoan OTUs and stramenopile OTUs. The latter pattern was not found for the Möhne, in

238 which community composition remained similar during the same two weeks. We assume that changes  
239 in community composition in the Ruhr can be explained by minimal changes of abiotic factors, such  
240 as slightly prolonged duration of sunshine and higher temperatures or slight variations in discharge or  
241 flow velocity. Although similar in structure to the Möhne, the Ruhr river is widely unregulated above  
242 the sampling site. The Möhne, in contrast, is regulated by a dam approximately 10 kilometres  
243 upstream of the sampling site, which prevents stronger changes in discharge and flow velocity. This  
244 might explain the greater stability of community composition observed in the Möhne, while the  
245 community in the Ruhr might be more exposed to changes in the environment. Further studies over a  
246 longer period of time, including more rivers and measuring more abiotic factors on a finer scale are  
247 needed to definitely answer the question of which and how abiotic factors influence the community  
248 inferred through eDNA metabarcoding at different points in time. Independent of the reasons behind  
249 the observed patterns, our findings show that communities inferred through eDNA metabarcoding can  
250 change within a relative short time period. This has previously been found for biofilms<sup>20</sup> and  
251 bacterioplankton<sup>21</sup> in rivers, but to our knowledge, our study is the first to report that this pattern can  
252 also be observed for metazoan taxa when using environmental DNA metabarcoding. Our results have  
253 important implications for study design and sampling campaigns implementing eDNA, as they show  
254 that eDNA samples for studies should be taken in as little time as possible to prevent possible biases  
255 due to temporal variation.

256 Third, we hypothesised that community composition inferred from eDNA metabarcoding differs  
257 between different locations at a sampling site on a small spatial scale, meaning that environmental  
258 DNA is not evenly distributed in the water columns of shallow rivers. This has not been studied before,  
259 although it is known from non-molecular work that community composition in rivers changes with  
260 water depth<sup>22</sup> and eDNA studies have found sediment to hold more fish DNA than surface water<sup>13</sup>,  
261 possibly hinting at a spatial pattern of eDNA distribution in rivers. We found contrasting patterns: In  
262 the Ruhr, sampling location did not explain community composition in spring, but in autumn when  
263 metazoan OTUs were analysed. However, our results also show that the three samples taken per  
264 sampling location in the Ruhr in autumn do not always cluster closest together. This highlights that  
265 community composition inferred through eDNA metabarcoding can change even when samples are  
266 taken within less than a minute, but it might also show that during processing and amplification of  
267 samples, community composition can be changed due to stochasticity of PCR reactions<sup>23</sup>. In the

268 Möhne, sampling location explained the community composition of all OTUs. Likewise, communities  
269 found in surface water samples and those found in riverbed samples significantly differed in the Ruhr  
270 in autumn when analysing all OTUs and metazoan OTUs and also differed in the Möhne when  
271 metazoan OTUs were analysed.

272 Our finding shows that not all eDNA is homogeneously distributed in the water column in all rivers. In  
273 addition, as a spatial variation in community composition was found in the Ruhr in autumn, but not in  
274 spring, it shows that this pattern might change within a river over time, although statistical power was  
275 better for the Ruhr autumn samples due to the higher number of samples taken. It seems likely that in  
276 areas of high spring discharge due to precipitation or snowmelt, community composition might be  
277 more dynamic during these times, as has been shown before<sup>24,25</sup>. The same could happen at any time  
278 when events change abiotic factors in the stream. While horizontal sampling location did not  
279 significantly influence the inferred community composition, the vertical sampling location did.  
280 Communities change with water depth, e.g. due to different habitats<sup>26,27</sup> and fish DNA has been  
281 shown to be more abundant in sediments<sup>13</sup>. However, environmental DNA metabarcoding has so far  
282 not been used to describe differences in community composition between surface and riverbed in  
283 rivers. Our finding that community composition inferred through eDNA metabarcoding can be different  
284 on a small spatial scale in shallow rivers has highly important implications for future eDNA-based  
285 work. If this pattern is found in shallow rivers with less than 1 metre depth, it can be expected to be  
286 even more pronounced in wide, deep rivers, which are known to harbour highly diverse communities  
287 on a small spatial scale<sup>28</sup>. Thus, if the goal is to assess the whole biodiversity, several samples of  
288 surface and riverbed water should be taken, an approach that is similar to the multi-habitat sampling  
289 used for classical sampling of invertebrates<sup>29</sup> and that is also applied when sampling eDNA in  
290 standing waters<sup>30,31</sup>. Surface water might more often contain eDNA from further upstream in the river  
291 catchment, while riverbed water flows over a multitude of obstacles and might contain more eDNA  
292 from the (micro)habitats directly upstream of the sampling site. It has been shown previously that  
293 eDNA can be transported over long distances<sup>32</sup>, but also that retention and resuspension can play a  
294 major role<sup>14</sup>. To date it remains unclear to what extent transport distance of eDNA differs between  
295 surface water and water moving close to the riverbed and spatial resolution of eDNA is also not yet  
296 fully understood<sup>15</sup>. Our study highlights the need for follow-up studies addressing the community

297 composition on small spatial scale. Sampling several upstream sites simultaneously might reveal  
298 where eDNA found at different locations in the water column of rivers actually originates.

299 Another aspect to take into consideration when planning eDNA studies is the choice of primers. We  
300 found the highly degenerate BF/BR2 primers, which were originally developed for stream  
301 macroinvertebrates<sup>33</sup>, to amplify a wide range of taxonomic groups. However, only between 16 % and  
302 18 % of OTUs per stream were found to be Metazoa, which is probably due to the comparably large  
303 biomass of floating microorganisms in the water. The majority of OTUs (between 42 % and 54 % per  
304 stream) were identified as Stramenopiles, which comprise Oomycota and Bacillariophyta (diatoms).  
305 The COI gene can be used to identify taxa within these groups<sup>34,35</sup> and other microbial taxa such as  
306 *Amoeba*<sup>36</sup>, but reference databases are currently poorly equipped, making taxonomic assignment  
307 challenging or impossible. For amplifying macrozoobenthic taxa relevant for classical stream  
308 monitoring, the BF2/BR2 primers have been shown to perform very well<sup>37</sup>, but more specific primers  
309 might be a better choice when these taxa are to be amplified from eDNA water samples. Recently,  
310 long-range PCR with specific 16S rRNA primers has been shown to amplify whole mitochondrial  
311 genomes from eDNA samples, which might be an alternative for future eDNA metabarcoding studies  
312 when paired with high-throughput sequencing approaches on NGS machines producing long reads<sup>38</sup>.  
313 However, if assessing the whole community, including microbial taxa, is aimed for, using degenerate  
314 COI primers might be an alternative to current approaches using markers such as 18s rRNA, which is  
315 commonly used<sup>39,40</sup>. Although COI is not without problems when it comes to non-metazoan taxa<sup>41</sup>,  
316 mostly because little is known on how well the marker resolves taxa, using highly degenerate COI  
317 primers might be a promising approach to bridge the gap between metabarcoding microbial taxa and  
318 metazoans, for which mainly COI databases exist<sup>42</sup>.

319 In conclusion, we found strong evidence that not all eDNA is everywhere and not all the time in rivers.  
320 Future studies applying the technique of eDNA metabarcoding should be carefully planned with  
321 regard to sampling design and primer choice. It should be made sure to collect water for analyses  
322 within a short period of time and from several sampling locations in a river in order to prevent  
323 misinterpretations due to changing abiotic factors or different sampled microhabitats. In order to make  
324 the technique of eDNA metabarcoding widely applicable for biomonitoring and community ecology,  
325 more studies addressing the exact spatial and temporal scale of eDNA distribution and the impacts of  
326 abiotic factors on the recovered community are needed. This is especially important as eDNA is



327 becoming an increasingly popular tool for biomonitoring and biodiversity assessment of ecosystems.  
328 The technique holds great potential, but technical issues such as appropriate primers and sampling  
329 design have not been widely tested, a step that should not be neglected if the technique is to be used  
330 in biodiversity assessments and ecological studies.

331

## 332 **Methods**

333

334 Samples were taken from three rivers: Ruhr (51°26'55.6"N 7°57'09.0"E), Möhne (51°28'03.7"N  
335 7°58'59.6"E) and Gillbach (51°00'52.2"N 6°41'04.4"E) (Figure 5a). Ruhr and Möhne are similar in their  
336 characteristics in close proximity to each other (<10km). Ruhr and Möhne were sampled three times  
337 in spring, with each sampling one week apart. The Ruhr was again sampled in autumn and the  
338 Gillbach was sampled in winter (Figure 5b). Water samples were taken by filling a new, sterile plastic  
339 bottle (Nalgene, Rochester, USA) with 1 litre of water directly below the stream surface for the two  
340 surface sampling locations and directly below these locations, 5 cm above the riverbed for the  
341 riverbed sampling locations (Figure 5c). Stream depth was roughly 75 cm (Ruhr), 60cm (Möhne) and  
342 45 cm (Gillbach).

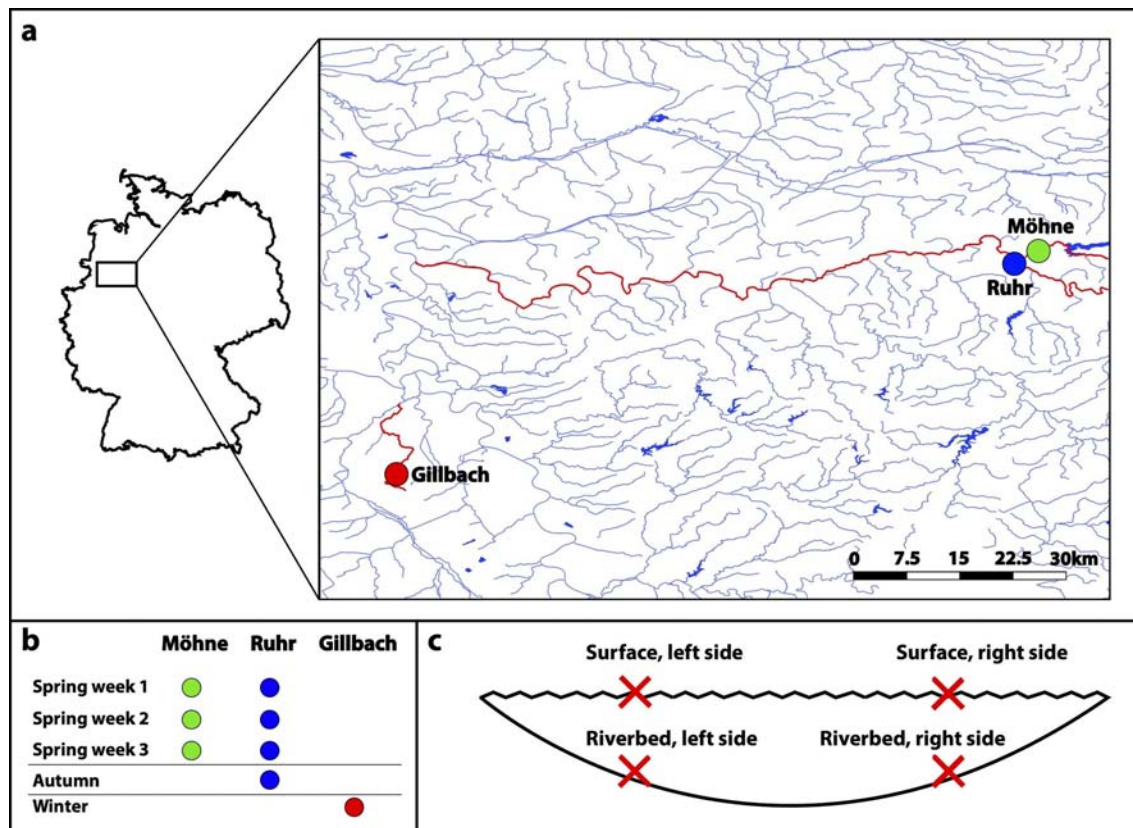

343



344 **Figure 5: a) Map of the sampling sites, with sampled rivers marked in green (Möhne), blue**  
345 **(Ruhr) and red (Gillbach) b) Sampling scheme in spring, autumn and winter for the three**  
346 **sampled rivers. c) Profile of a stream showing sampling locations at a given site.**

347

348 To test for variation of individual samples per location, three bottles of water per location were taken  
349 from the Ruhr in autumn. For taking the riverbed water samples, bottles were immersed, opened,  
350 filled and closed again under water. Sampling sites were marked with GPS and poles in the water to  
351 exactly sample the same locations during the next visits. Sampling locations were located roughly  $\frac{1}{4}$   
352 of the stream width away from the left and right riverbanks, respectively (Möhne: 3.5 m, Ruhr: 8 m,  
353 Gillbach: 1.5 m). All samplings were performed between 11:00 am and 1 pm. Water temperature at  
354 each location was measured with a thermometer directly below the surface. Water depth was  
355 measured by using a folding rule and flow velocity was measured by letting a styrofoam ball drift over  
356 the distance of one meter while stopping the time (all abiotic data: Supplementary table 6). Bottles  
357 were transported back to the lab at 4 °C and 1 l of water was filtered through cellulose nitrate filters  
358 (0.2  $\mu\text{m}$  pore size, Nalgene) with the help of a vacuum pump (VCP-8101). For each sampling, one  
359 litre of sterile water was filtered as negative control (eight total). Filters were carefully handled with  
360 sterile tweezers, folded, transferred to 90% molecular grade EtOH and stored at -20 °C until further  
361 processing. All lab work was conducted in a lab room specifically prepared and only used for eDNA  
362 work, in which no PCR products are present. All persons involved in handling samples wore full body  
363 protective clothing and surgical masks as breathing protection. The lab room is frequently cleaned  
364 with hydrogen peroxide solution and irradiated with high-intense UV light every night. Furthermore,  
365 samples were only handled under sterile UV hoods.

366 Filters were ripped to small pieces before proteinase k digestion and DNA extraction followed a salt  
367 extraction protocol (<sup>43</sup> adjusted as in <sup>44</sup>). Extracted DNA was quantified on a FragmentAnalyzer with  
368 the Standard Sensitivity Genomic Kit (AdvancedAnalytical, Oak Tree, USA) and 15 ng of DNA per  
369 sample was used for PCR. A two-step PCR protocol was used: For the first PCR, primers BF2 and  
370 BR2<sup>33</sup> without tails were used for amplification using illustra PuReTaq Ready-to-go PCR beads (GE  
371 Heatlcare, Little Chalfont, UK). After an initial denaturation for 3 minutes at 94°C, 25 cycles at 94°C  
372 for 30 seconds, 48°C for 30 seconds, 72°C for two minutes were performed, followed by a final  
373 elongation at 72°C for five minutes. For the second PCR, 1  $\mu\text{l}$  of the product was used with

374 individually tagged BF2 / BR2 primers (combinations: Supplementary table 1). The PCR protocol  
375 remained the same, but 15 cycles were used. Two independent PCRs (1st + 2nd step) were run for  
376 each sample. PCR products were cleaned up using the MinElute PCR Purification Kit (Qiagen, Venlo,  
377 Netherlands), quantified on the Fragment Analyzer using the NGS High Sensitivity Kit, left side size  
378 selected using SpriSelect beads (Beckman Coulter, Brea, USA) and equimolar pooled. Negative  
379 controls were quantified together with the other samples and were added to the library so that they  
380 made up 10% of the total library volume. The final DNA library was again cleaned using the Qiagen  
381 MinElute kit and sent for sequencing on the Illumina MiSeq platform (Two runs, v2 chemistry,  
382 2x250bp) at GATC Biotech (Constance, Germany).

383 Raw reads were processed as in<sup>45</sup>. In short, reads were demultiplexed and paired-end reads were  
384 merged using USEARCH (v.8.1.1756<sup>46</sup>). Since read quality of one sequencing run was low, read pairs  
385 were discarded if the number of expected errors predicted by the phred scores after merging was  
386 higher than three. Primers were removed with cutadapt (v.1.9<sup>47</sup>). Sequences were dereplicated,  
387 singletons were removed and the Uparse pipeline<sup>48</sup> (97% identity) was used to cluster OTUs. Further,  
388 reads including singletons were mapped against the clustered OTUs. Subsequently, only OTUs that  
389 had read abundances over 0.004 percent (i.e. read abundance >1 in the samples with =<25,000  
390 reads) per sample were retained, while OTUs with lower read abundance were discarded (all scripts:  
391 Supplementary material 1). This is a suitable alternative to rarefaction<sup>49</sup>. Due to the higher threshold  
392 used for paired-end merging performed by USEARCH and in order to remove possible false OTUs,  
393 only OTUs present in both replicates per sample were counted as present and further analysed.

394 Taxonomy was assigned to OTUs using MEGAN<sup>50</sup> (Settings: -evalue 1e-60, -max\_target\_seqs 10).  
395 To assign taxonomy to OTUs on kingdom level (NCBI taxonomy), a min\_score of 300 (corresponding  
396 to ~80% identity in this dataset consisting of 421 bp reads) was applied. Metazoan and stramenopile  
397 OTUs used for further analyses were identified with a restrictive min\_score of 700 (corresponding to  
398 ~97% identity) to further filter out possible false OTUs. A custom made dataset consisting of all COI  
399 sequences deposited in Genbank (2.5 million sequences, downloaded on 20-02-2017, maximum  
400 length 5000 bp) was used for Megan analyses. Sequences were dereplicated prior to database  
401 building in order to remove overrepresented genetic sequences. The lowest taxonomic level assigned  
402 to OTUs was order to account for any inaccuracies due to misidentified specimens in the database.

403 Analyses of community structure were performed in R (v.3.3.2, R Core Development Team 2017)  
404 using the package vegan (v.2.4-1<sup>51</sup>) for all OTUs, metazoan OTUs and stramenopile OTUs. Jaccard  
405 distances were calculated with the vegdist function. The 'adonis' function was used to perform  
406 PERMANOVA as in<sup>52</sup> on Jaccard distances calculated for communities in the three sampled rivers,  
407 per sampling location (surface left side vs. surface right side vs. riverbed left side vs. riverbed right  
408 side; left riverside vs. right river river side; surface vs. riverbed) and per sampling time, respectively, to  
409 test whether these factors explain community composition. The Gillbach was only included in  
410 analyses inferring the differences in community composition between rivers, since only three sampling  
411 locations were retained after read quality filtering.

412 Only PERMANOVA results with  $R^2 > 0.09$  and  $p < 0.05$  were regarded as strong enough to reliably  
413 show an effect of the tested factor. Our approach is based on the assumption that a correlation  
414 coefficient  $r$  of 0.3 is showing a moderate effect<sup>53</sup>, and 0.09 is the corresponding  $R^2$ . Consequently,  
415 we interpret  $R^2 > 0.25$  as indicating strong effects, which corresponds to  $r > 0.5$  (a strong effect as  
416 defined by<sup>54</sup>). NMDS plots for the binary dataset were generated using the metaMDS function as  
417 implemented in vegan (binary = T, k = 2, trymax = 1000, autotransform = F). The abiotic data was  
418 used to visualise community structure with the ordiplot function. Maps were created with QGIS  
419 (v.2.18, QGIS Development Team, 2016) and figures were created with Adobe Illustrator (Adobe  
420 Systems, San José, USA)

421

## 422 **Data availability**

423 Data has been deposited in the Short Read Archive (will be available upon publication)

424

## 425 **Acknowledgements**

426 We thank Edith Vamos, Bianca Peinert and Cristina Hartmann-Fatu for help in the lab, Thomas  
427 Euteneuer-Macher and Anika Jedrzejewski for help with sampling and the Herzog-Sellenberg  
428 Foundation for financial support. Vasco Elbrecht, Romana Salis, Vera Ziska, Martina Weiss and Arne  
429 Beermann are thanked for proof-reading the manuscript and providing helpful comments.

430

431

432 **Author contributions**

433 JNM and FL designed the experiment, JNM conducted field and laboratory work, JNM performed the  
434 analyses and JNM and FL wrote the manuscript.

435

436 **Competing financial interests**

437 The authors declare that they do not have any competing financial interests.

438

439 **References**

- 440 1. Vörösmarty, C. J. *et al.* Global threats to human water security and river biodiversity. *Nature* **467**,  
441 555–561 (2010).
- 442 2. Taberlet, P., Coissac, E., Hajibabaei, M. & Rieseberg, L. H. Environmental DNA. *Mol. Ecol.* **21**,  
443 1789–1793 (2012).
- 444 3. Deiner, K., Fronhofer, E. A., Mächler, E., Walser, J.-C. & Altermatt, F. Environmental DNA  
445 reveals that rivers are conveyor belts of biodiversity information. *Nat. Commun.* **7**, 12544 (2016).
- 446 4. Haase, P. *et al.* Assessing the impact of errors in sorting and identifying macroinvertebrate  
447 samples. *Hydrobiologia* **566**, 505–521 (2006).
- 448 5. Macher, J. N. *et al.* Multiple-stressor effects on stream invertebrates: DNA barcoding reveals  
449 contrasting responses of cryptic mayfly species. *Ecol. Indic.* **61**, 159–169 (2016).
- 450 6. Bista, I. *et al.* Annual time-series analysis of aqueous eDNA reveals ecologically relevant  
451 dynamics of lake ecosystem biodiversity. *Nat. Commun.* **8**, 14087 (2017).
- 452 7. Hänfling, B. *et al.* Environmental DNA metabarcoding of lake fish communities reflects long-term  
453 data from established survey methods. *Mol. Ecol.* **25**, 3101–3119 (2016).
- 454 8. Mächler, E., Deiner, K., Steinmann, P. & Altermatt, F. Utility of environmental DNA for monitoring  
455 rare and indicator macroinvertebrate species. *Freshw. Sci.* **33**, 1174–1183 (2014).
- 456 9. Pilliod, D. S., Goldberg, C. S., Arkle, R. S. & Waits, L. P. Factors influencing detection of eDNA  
457 from a stream-dwelling amphibian. *Mol. Ecol. Resour.* **14**, 109–116 (2014).
- 458 10. Spens, J. *et al.* Comparison of capture and storage methods for aqueous microbial eDNA using  
459 an optimized extraction protocol: advantage of enclosed filter. *Methods Ecol. Evol.* **8**, 635–645  
460 (2016).

- 461 11. Deiner, K., Walser, J.-C., Mächler, E. & Altermatt, F. Choice of capture and extraction methods  
462 affect detection of freshwater biodiversity from environmental DNA. *Biol. Conserv.* **183**, 53–63  
463 (2015).
- 464 12. Civade, R. *et al.* Spatial Representativeness of Environmental DNA Metabarcoding Signal for  
465 Fish Biodiversity Assessment in a Natural Freshwater System. *PLoS One* **11**, e0157366 (2016).
- 466 13. Turner, C. R., Uy, K. L. & Everhart, R. C. Fish environmental DNA is more concentrated in  
467 aquatic sediments than surface water. *Biol. Conserv.* **183**, 93–102 (2015).
- 468 14. Shogren, A. J. *et al.* Controls on eDNA movement in streams: Transport, Retention, and  
469 Resuspension. *Sci. Rep.* **7**, (2017).
- 470 15. Barnes, M. A. & Turner, C. R. The ecology of environmental DNA and implications for  
471 conservation genetics. *Conserv. Genet.* **17**, 1–17 (2015).
- 472 16. Costa, S. S. & Melo, A. S. Beta diversity in stream macroinvertebrate assemblages: among-site  
473 and among-microhabitat components. *Hydrobiologia* **598**, 131–138 (2007).
- 474 17. Port, J. A. *et al.* Assessing vertebrate biodiversity in a kelp forest ecosystem using environmental  
475 DNA. *Mol. Ecol.* **25**, 527–541 (2015).
- 476 18. Stoeckle, M. Y., Soboleva, L. & Charlop-Powers, Z. Aquatic environmental DNA detects seasonal  
477 fish abundance and habitat preference in an urban estuary. *PLoS One* **12**, e0175186 (2017).
- 478 19. Jackson, D. A., Peres-Neto, P. R. & Olden, J. D. What controls who is where in freshwater fish  
479 communities – the roles of biotic, abiotic, and spatial factors. *Can. J. Fish. Aquat. Sci.* **58**, 157–  
480 170 (2001).
- 481 20. Lear, G., Anderson, M. J., Smith, J. P., Boxen, K. & Lewis, G. D. Spatial and temporal  
482 heterogeneity of the bacterial communities in stream epilithic biofilms. *FEMS Microbiol. Ecol.* **65**,  
483 463–473 (2008).
- 484 21. Portillo, M. C., Anderson, S. P. & Fierer, N. Temporal variability in the diversity and composition  
485 of stream bacterioplankton communities. *Environ. Microbiol.* **14**, 2417–2428 (2012).
- 486 22. Stewart, D. J., Ibarra, M. & Barriga-Salazar, R. Comparison of Deep-River and Adjacent Sandy-  
487 Beach Fish Assemblages in the Napo River Basin, Eastern Ecuador. *Copeia* **2002**, 333–343  
488 (2002).
- 489 23. Leray, M. & Knowlton, N. Random sampling causes the low reproducibility of rare eukaryotic  
490 OTUs in Illumina COI metabarcoding. *PeerJ* **5**, e3006 (2017).

- 491 24. Reice, S. R. Experimental disturbance and the maintenance of species diversity in a stream  
492 community. *Oecologia* **67**, 90–97 (1985).
- 493 25. Woodward, G., Bonada, N., Feeley, H. B. & Giller, P. S. Resilience of a stream community to  
494 extreme climatic events and long-term recovery from a catastrophic flood. *Freshw. Biol.* **60**,  
495 2497–2510 (2015).
- 496 26. Matthews, W. J. & Hill, L. G. Habitat Partitioning in the Fish Community of a Southwestern River.  
497 *Southwest. Nat.* **25**, 51 (1980).
- 498 27. Hardwick, G. G., Blinn, D. W. & Usher, H. D. Epiphytic Diatoms on *Cladophora glomerata* in the  
499 Colorado River, Arizona: Longitudinal and Vertical Distribution in a Regulated River. *Southwest.*  
500 *Nat.* **37**, 148 (1992).
- 501 28. Alter, S. E., Elizabeth Alter, S., Munshi-South, J. & Stiasny, M. L. J. Genomewide SNP data  
502 reveal cryptic phylogeographic structure and microallopatric divergence in a rapids-adapted clade  
503 of cichlids from the Congo River. *Mol. Ecol.* **26**, 1401–1419 (2017).
- 504 29. Hering, D. *et al.* The Development of a System to Assess the Ecological Quality of Streams  
505 Based on Macroinvertebrates – Design of the Sampling Programme within the AQEM Project. *Int.*  
506 *Rev. Hydrobiol.* **88**, 345–361 (2003).
- 507 30. Thomsen, P. F. *et al.* Monitoring endangered freshwater biodiversity using environmental DNA.  
508 *Mol. Ecol.* **21**, 2565–2573 (2012).
- 509 31. Rees, H. C. *et al.* The application of eDNA for monitoring of the Great Crested Newt in the UK.  
510 *Ecol. Evol.* **4**, 4023–4032 (2014).
- 511 32. Deiner, K. & Altermatt, F. Transport Distance of Invertebrate Environmental DNA in a Natural  
512 River. *PLoS One* **9**, e88786 (2014).
- 513 33. Elbrecht, V. & Leese, F. Validation and Development of COI Metabarcoding Primers for  
514 Freshwater Macroinvertebrate Bioassessment. *Front. Environ. Sci.* **5** (2017).
- 515 34. Robideau, G. P. *et al.* DNA barcoding of oomycetes with cytochrome c oxidase subunit I and  
516 internal transcribed spacer. *Mol. Ecol. Resour.* **11**, 1002–1011 (2011).
- 517 35. Yamada, M. *et al.* Utility of mitochondrial-encoded cytochrome c oxidase I gene for phylogenetic  
518 analysis and species identification of the planktonic diatom genus *Skeletonema*. *Phycological*  
519 *Res.* **65**, 217–225 (2017).
- 520 36. Nasonova, E., Smirnov, A., Fahrni, J. & Pawlowski, J. Barcoding amoebae: comparison of SSU,

- 521 ITS and COI genes as tools for molecular identification of naked lobose amoebae. *Protist* **161**,  
522 102–115 (2010).
- 523 37. Elbrecht, V., Vamos, E. E., Meissner, K., Aroviita, J. & Leese, F. Assessing strengths and  
524 weaknesses of DNA metabarcoding-based macroinvertebrate identification for routine stream  
525 monitoring. *Methods Ecol. Evol.* (2017). doi:10.1111/2041-210x.12789
- 526 38. Deiner, K. *et al.* Long-range PCR allows sequencing of mitochondrial genomes from  
527 environmental DNA. *Methods Ecol. Evol.* (2017). doi:10.1111/2041-210x.12836
- 528 39. Tanabe, A. S. *et al.* Comparative study of the validity of three regions of the 18S-rRNA gene for  
529 massively parallel sequencing-based monitoring of the planktonic eukaryote community. *Mol.*  
530 *Ecol. Resour.* **16**, 402–414 (2016).
- 531 40. Chain, F. J. J., Brown, E. A., MacIsaac, H. J. & Cristescu, M. E. Metabarcoding reveals strong  
532 spatial structure and temporal turnover of zooplankton communities among marine and  
533 freshwater ports. *Diversity and Distributions* **22**, 493–504 (2016).
- 534 41. Pawlowski, J. *et al.* CBOL Protist Working Group: Barcoding Eukaryotic Richness beyond the  
535 Animal, Plant, and Fungal Kingdoms. *PLoS Biol.* **10**, e1001419 (2012).
- 536 42. Ratnasingham, S. & Hebert, P. D. N. BARCODING: bold: The Barcode of Life Data System  
537 (<http://www.barcodinglife.org>). *Mol. Ecol. Notes* **7**, 355–364 (2007).
- 538 43. Sunnucks, P. & Hales, D. F. Numerous transposed sequences of mitochondrial cytochrome  
539 oxidase I-II in aphids of the genus *Sitobion* (Hemiptera: Aphididae). *Mol. Biol. Evol.* **13**, 510–524  
540 (1996).
- 541 44. Weiss, M. & Leese, F. Widely distributed and regionally isolated! Drivers of genetic structure in  
542 *Gammarus fossarum* in a human-impacted landscape. *BMC Evol. Biol.* **16**, (2016).
- 543 45. Elbrecht, V. *et al.* Testing the potential of a ribosomal 16S marker for DNA metabarcoding of  
544 insects. *PeerJ* **4**, e1966 (2016).
- 545 46. Edgar, R. C. Search and clustering orders of magnitude faster than BLAST. *Bioinformatics* **26**,  
546 2460–2461 (2010).
- 547 47. Martin, M. Cutadapt removes adapter sequences from high-throughput sequencing reads.  
548 *EMBnet.journal* **17**, 10 (2011).
- 549 48. Edgar, R. C. UPARSE: highly accurate OTU sequences from microbial amplicon reads. *Nat.*  
550 *Methods* **10**, 996–998 (2013).



- 551 49. Elbrecht, V. & Leese, F. Can DNA-Based Ecosystem Assessments Quantify Species  
552 Abundance? Testing Primer Bias and Biomass--Sequence Relationships with an Innovative  
553 Metabarcoding Protocol. *PLoS One* **10**, e0130324 (2015).
- 554 50. Huson, D. H., Auch, A. F., Qi, J. & Schuster, S. C. MEGAN analysis of metagenomic data.  
555 *Genome Res.* **17**, 377–386 (2007).
- 556 51. Oksanen, J. *et al.* The vegan package. *Community ecology package* **10**, 631– 637 (2010).
- 557 52. Burdon, F. J. *et al.* Environmental context and magnitude of disturbance influence trait-mediated  
558 community responses to wastewater in streams. *Ecol. Evol.* **6**, 3923–3939 (2016).
- 559 53. Cohen, J. W. *Statistical power analysis for the behavioral sciences.* (Lawrence Earlbaum  
560 Associates,1988).
- 561 54. Nakagawa, S. & Cuthill, I. C. Effect size, confidence interval and statistical significance: a  
562 practical guide for biologists. *Biol. Rev. Camb. Philos. Soc.* **82**, 591–605 (2007).

563

## 564 **Figure legends**

565 **Figure 1: Taxonomy assigned to OTUs on kingdom level (NCBI taxonomy). a) Gillbach, b)**  
566 **Möhne, c) Ruhr (spring), d) Ruhr (autumn)**

567

568 **Figure 2: NMDS plot showing differences between communities in the rivers Ruhr (spring +**  
569 **autumn), Möhne and Gillbach. a) All OTUs, b) Metazoa, c) Stramenopiles. R<sup>2</sup> and p values**  
570 **shown correspond to the respective PERMANOVA results.**

571

572 **Figure 3: NMDS plot showing impact of sampling time (spring week 1, 2 and 3) on community**  
573 **composition in the rivers Ruhr and Möhne in spring. a) Ruhr, all OTUs, b) Ruhr, Metazoa, c)**  
574 **Ruhr, Stramenopiles, d) Möhne, all OTUs, e) Möhne, Metazoa, f) Möhne, Stramenopiles. R<sup>2</sup> and**  
575 **p values shown correspond to the respective PERMANOVA results.**

576

577 **Figure 4: NMDS plot showing impact of sampling location on community composition in the**  
578 **rivers Ruhr and Möhne in spring. a) Ruhr, all OTUs, b) Ruhr, Metazoa, c) Ruhr, Stramenopiles,**



579 d) Möhne, all OTUs, e) Möhne, Metazoa. f) Möhne, Metazoa.  $R^2$  and p values shown correspond  
580 to the respective PERMANOVA results.

581

582 **Figure 5: a) Map of the sampling sites, with sampled rivers marked in green (Möhne), blue**  
583 **(Ruhr) and red (Gillbach) b) Sampling scheme in spring, autumn and winter for the three**  
584 **sampled rivers. c) Profile of a stream showing sampling locations at a given site.**

**a**

bioRxiv preprint doi: <https://doi.org/10.1101/164046>; this version posted July 15, 2017. The copyright holder for this preprint (which was not certified by peer review) is the author/funder. All rights reserved. No reuse allowed without permission.

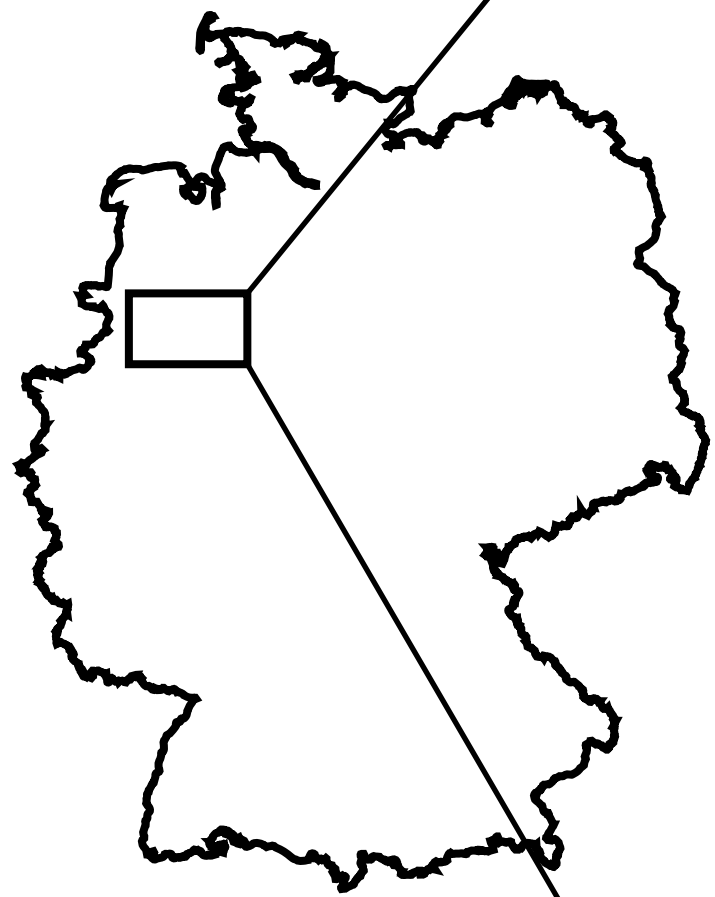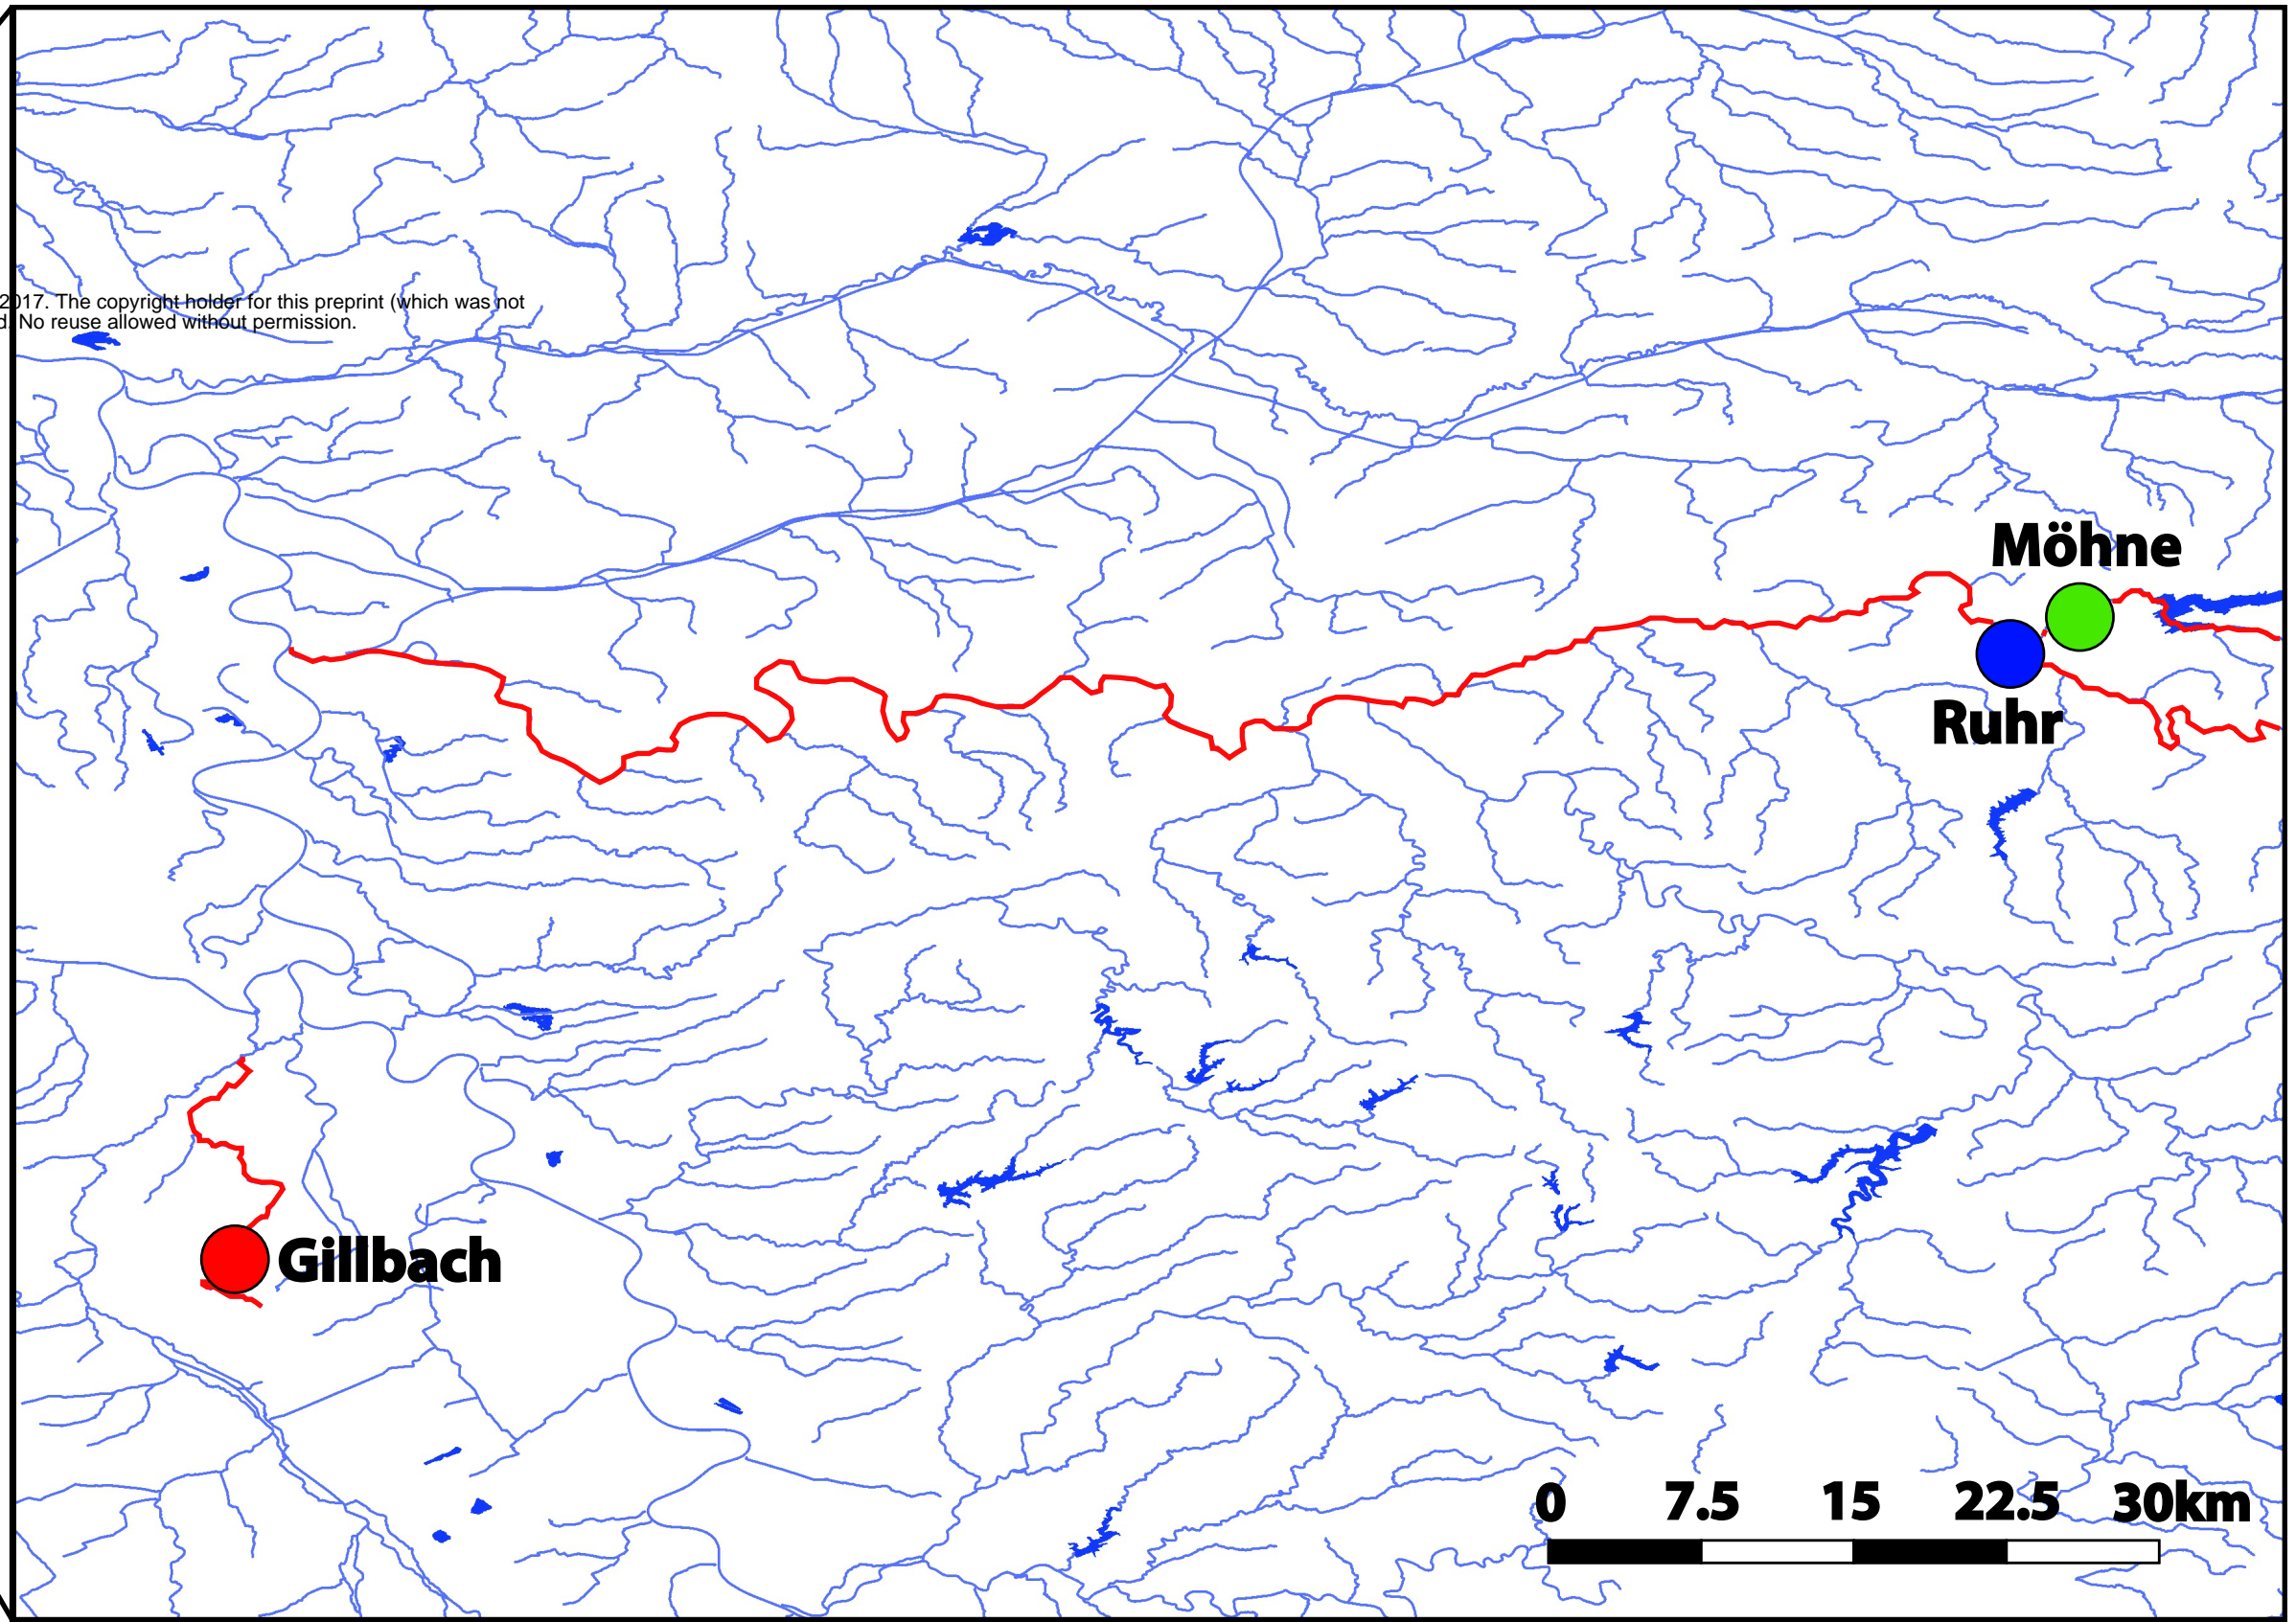**b**

**Möhne    Ruhr    Gilbach**

|               |   |   |   |
|---------------|---|---|---|
| Spring week 1 | ● | ● |   |
| Spring week 2 | ● | ● |   |
| Spring week 3 | ● | ● |   |
| Autumn        |   | ● |   |
| Winter        |   |   | ● |

**c**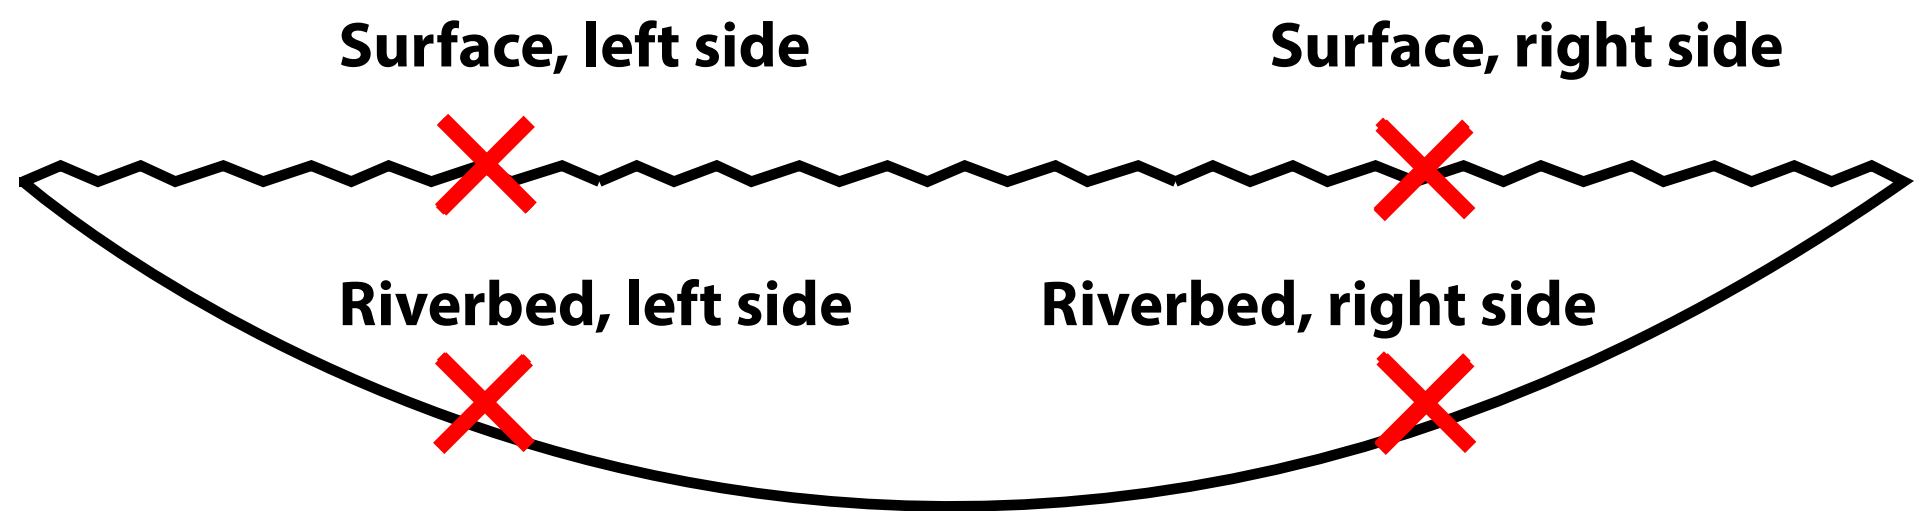

## Ruhr

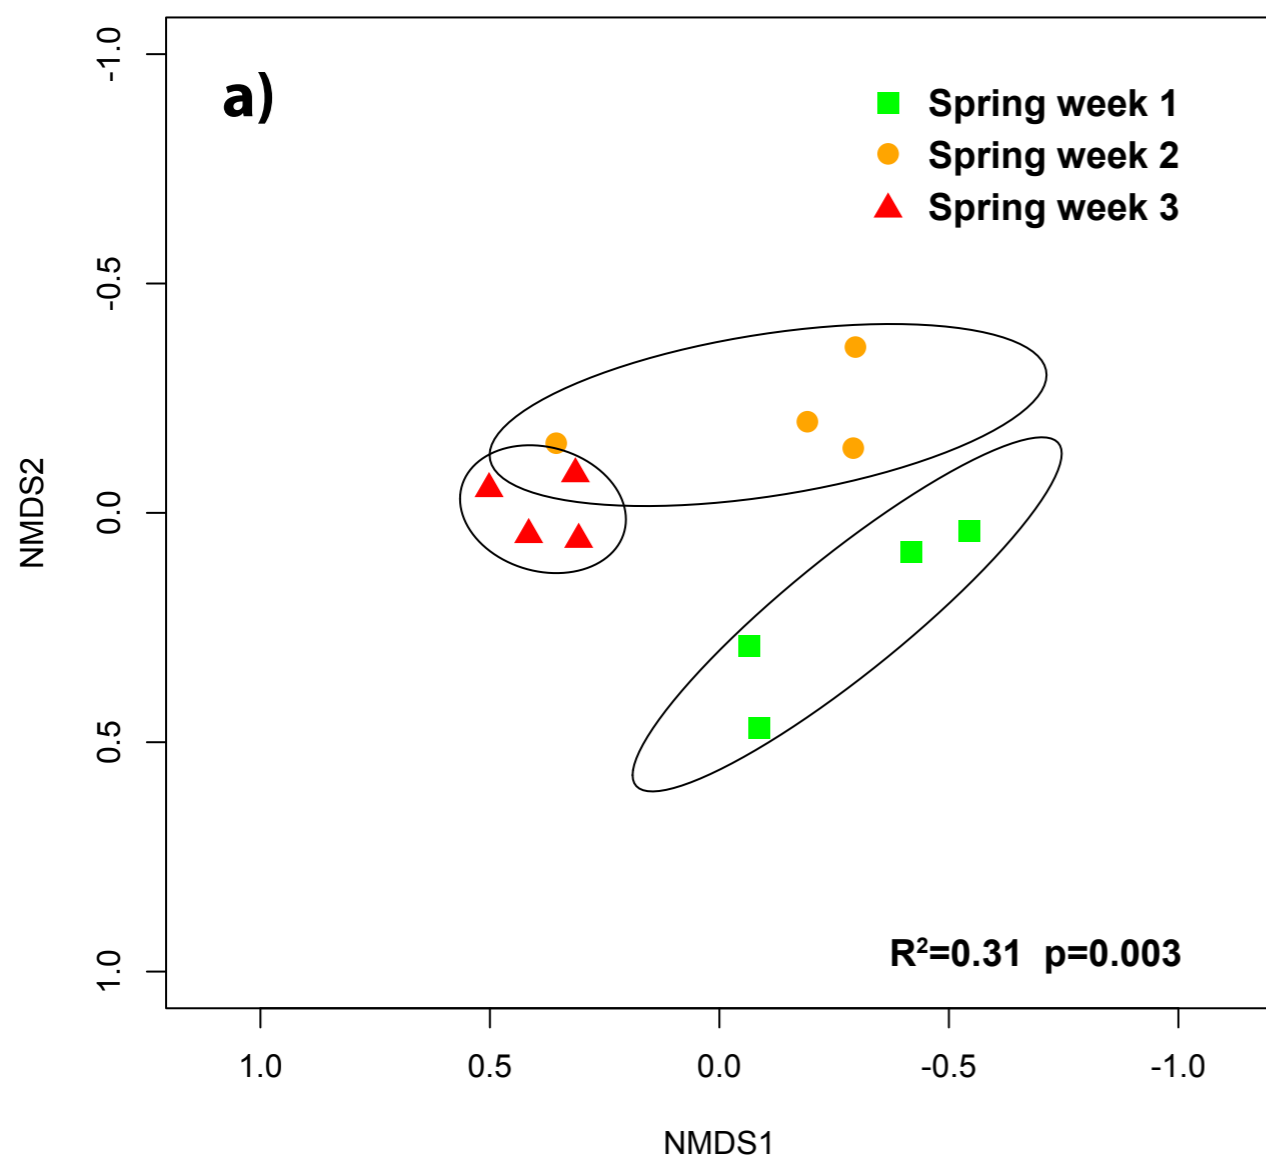

## Möhne

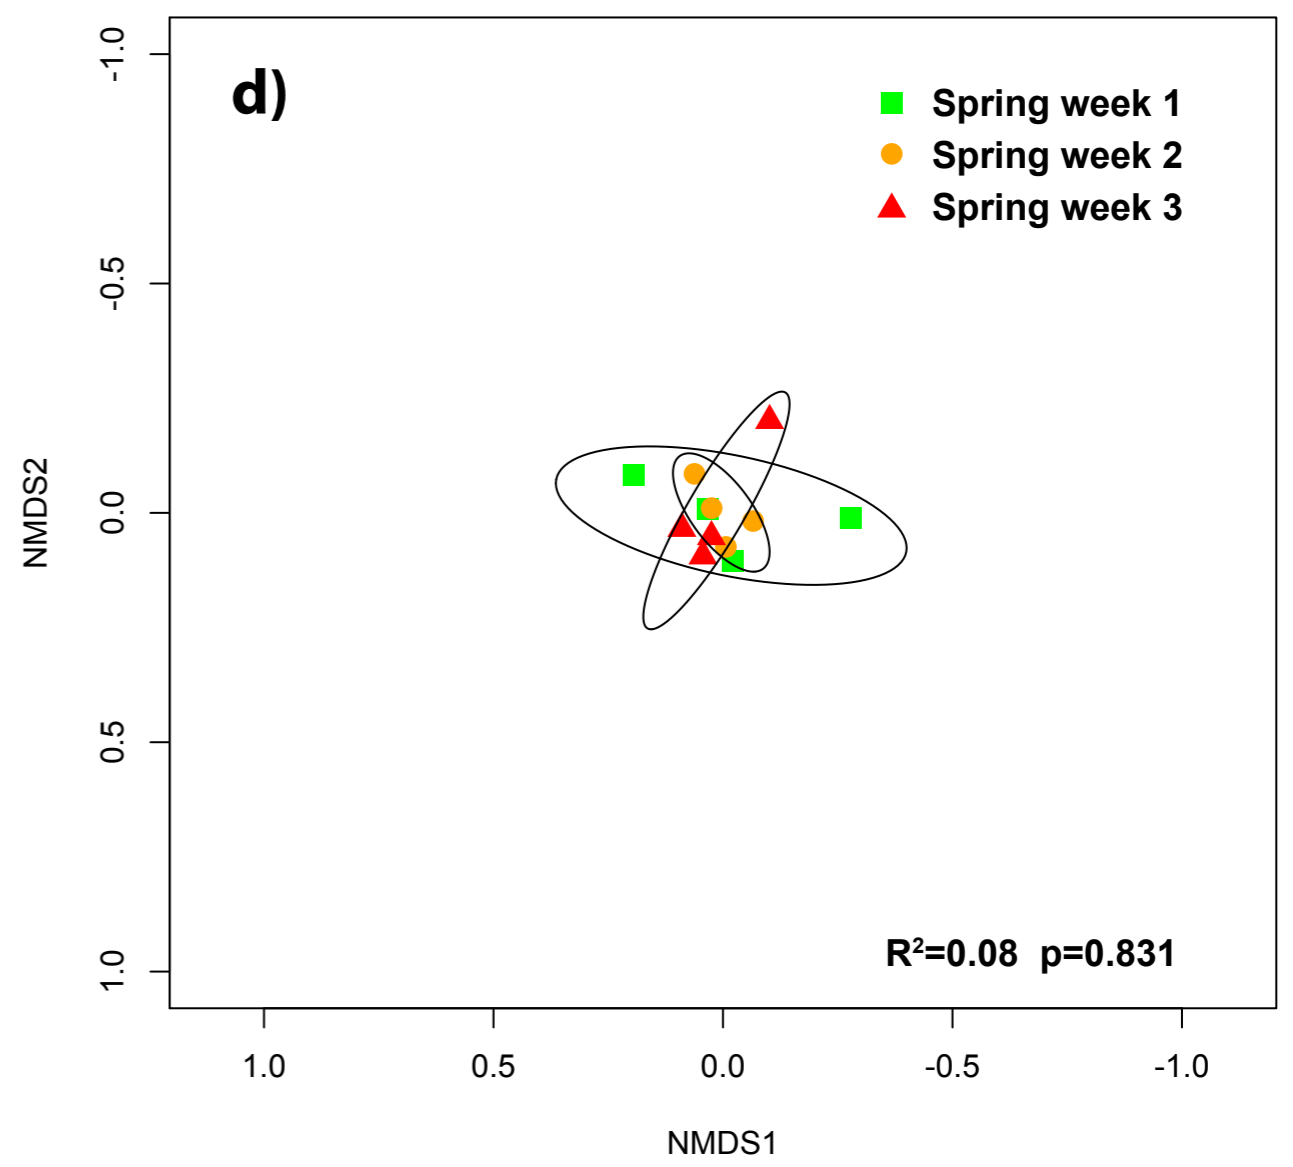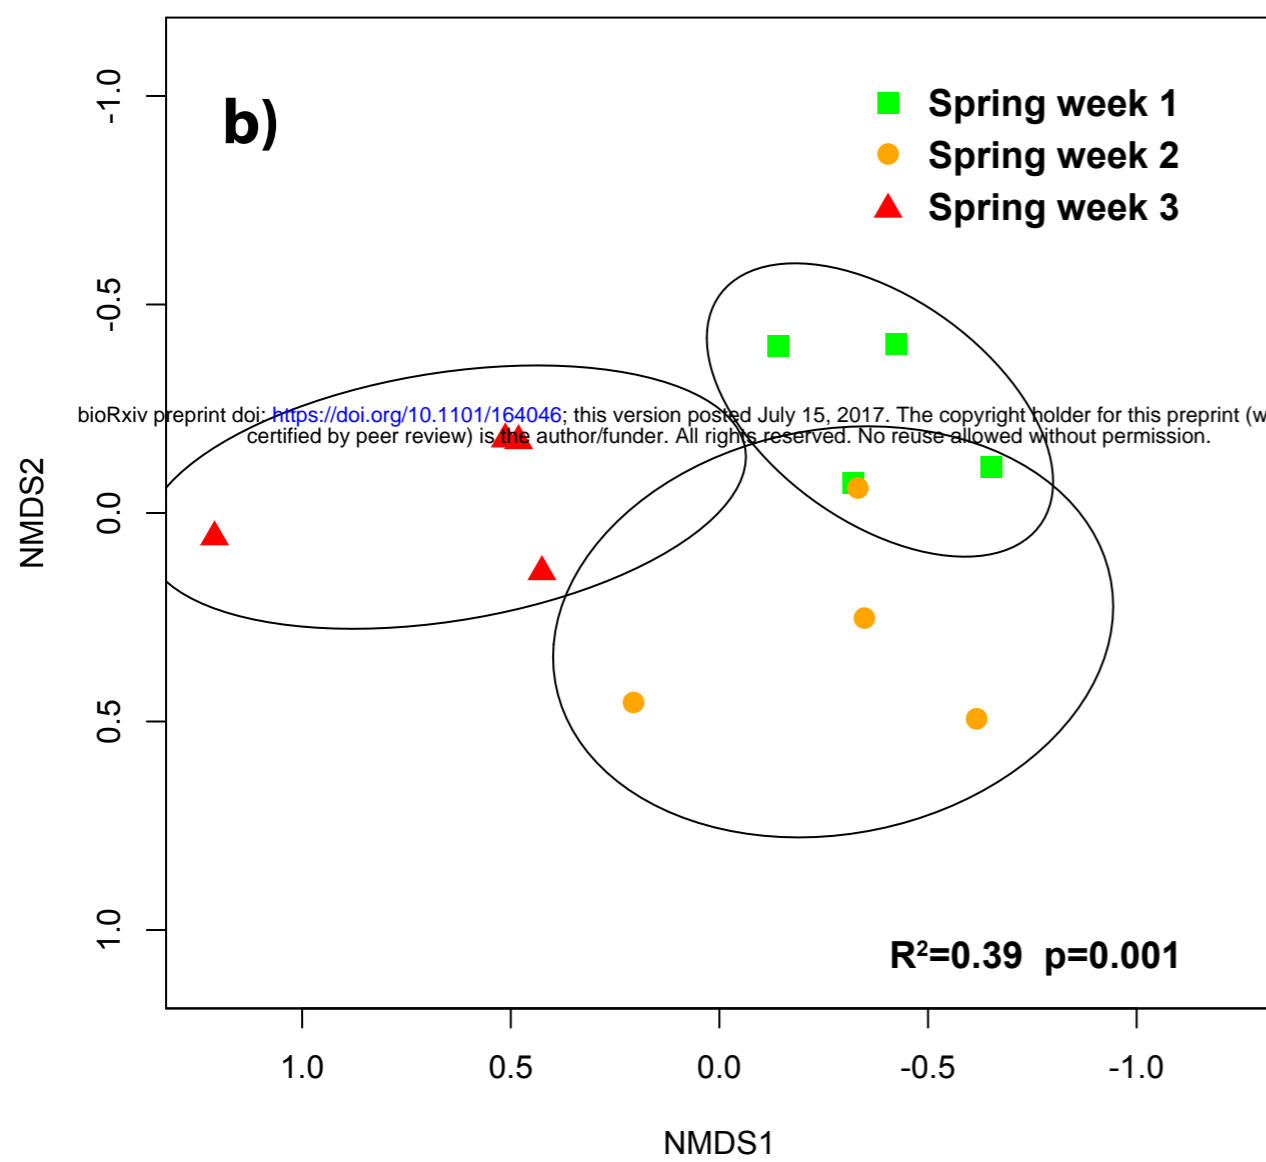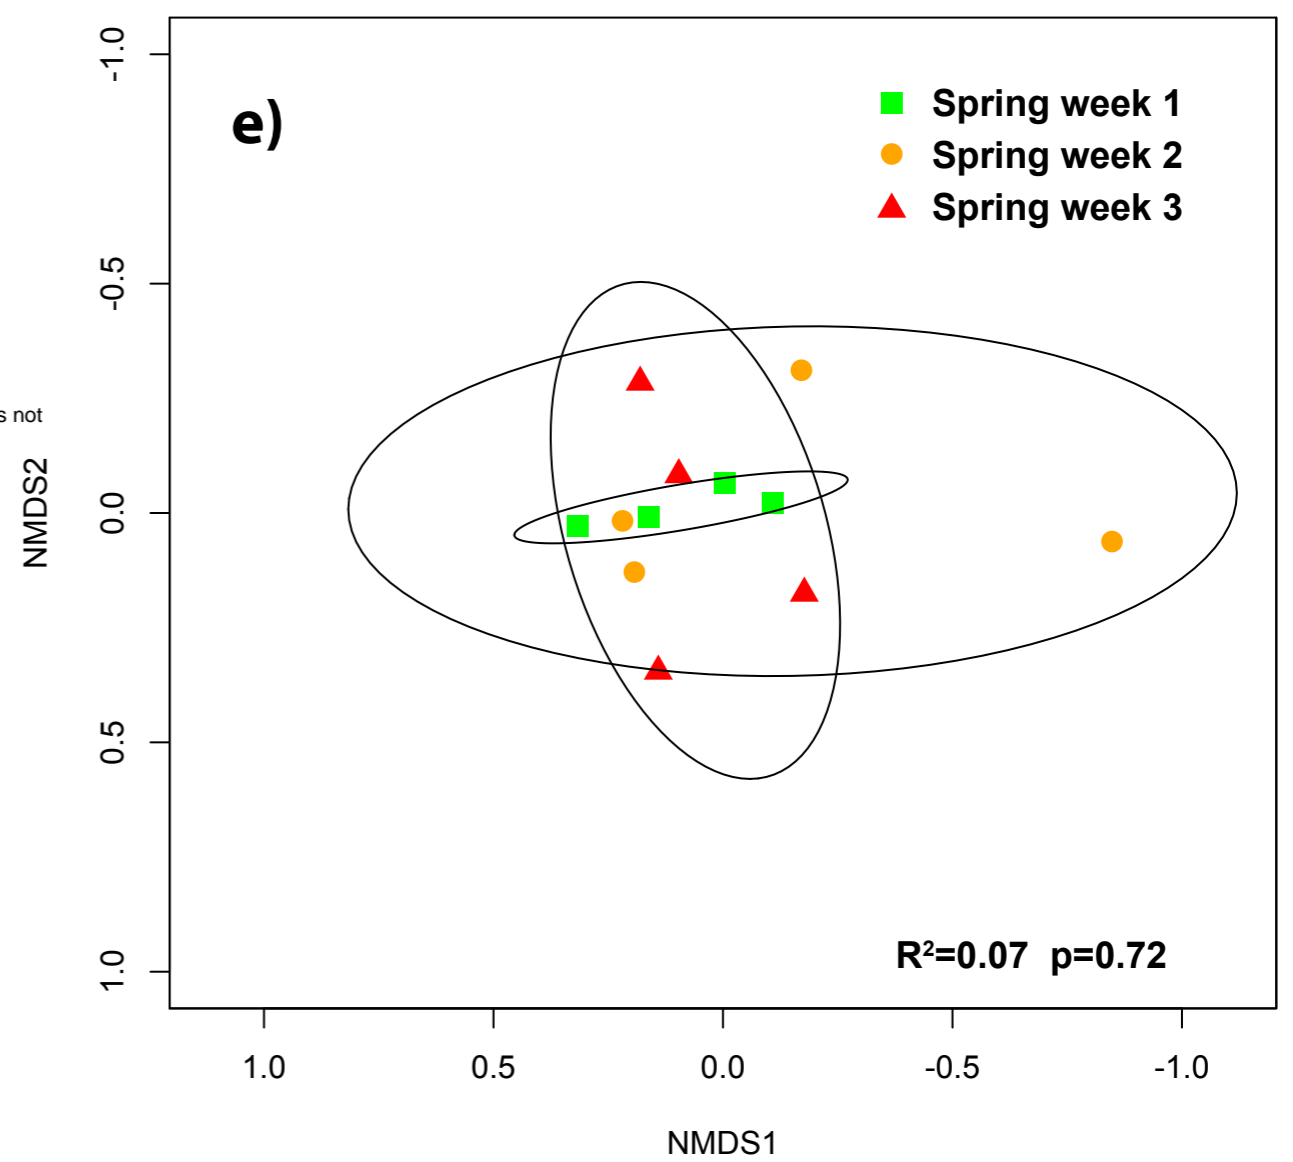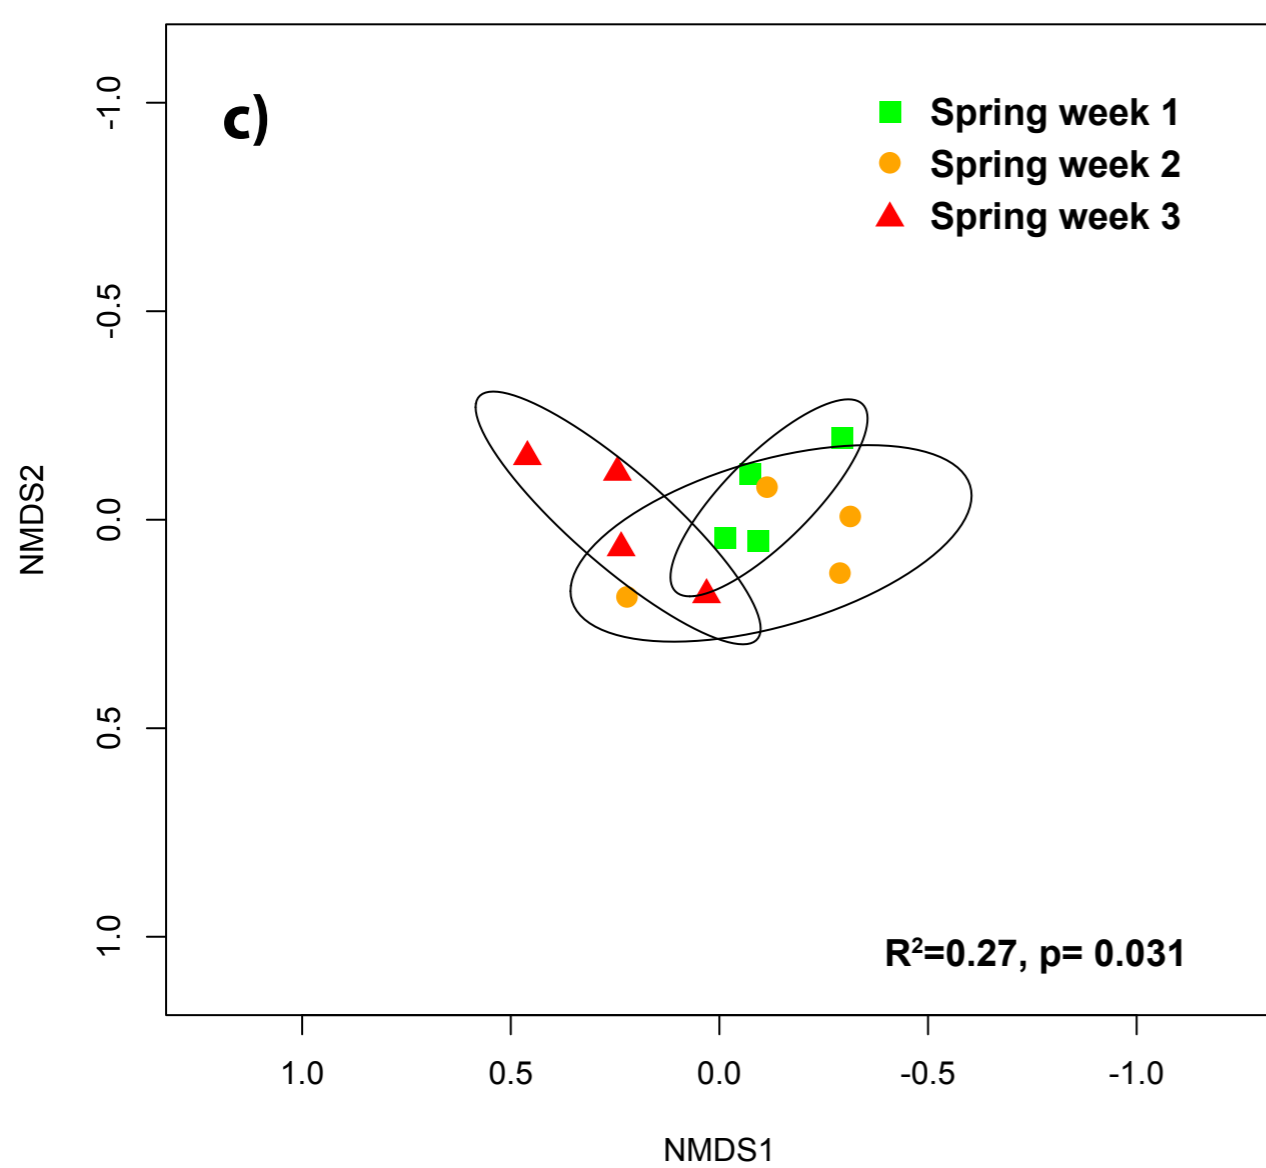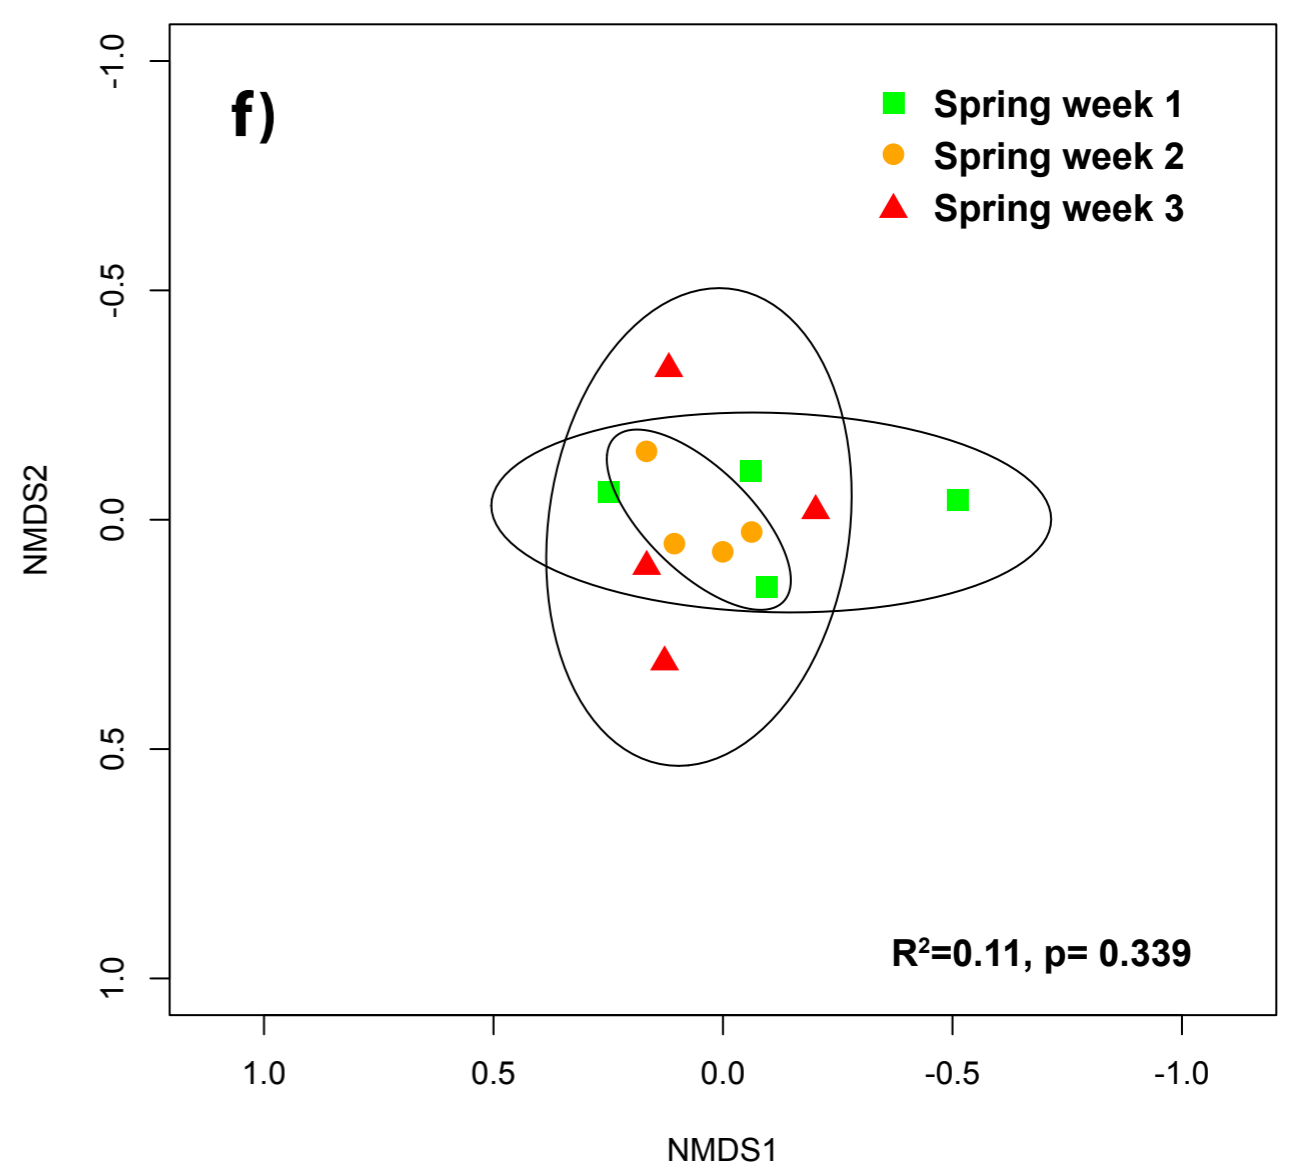



## Ruhr

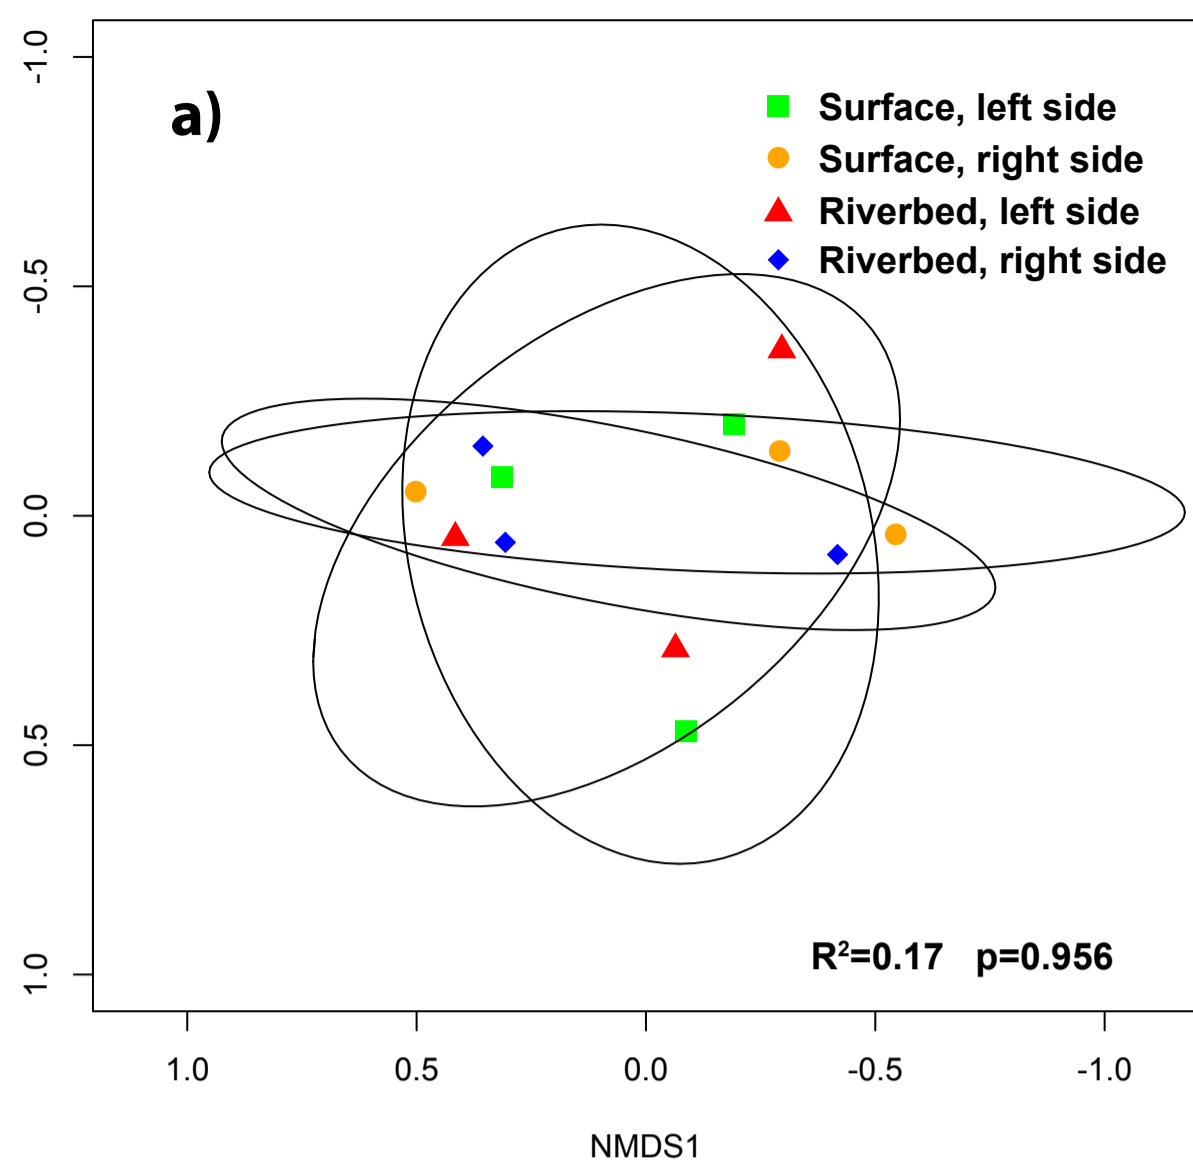

## Möhne

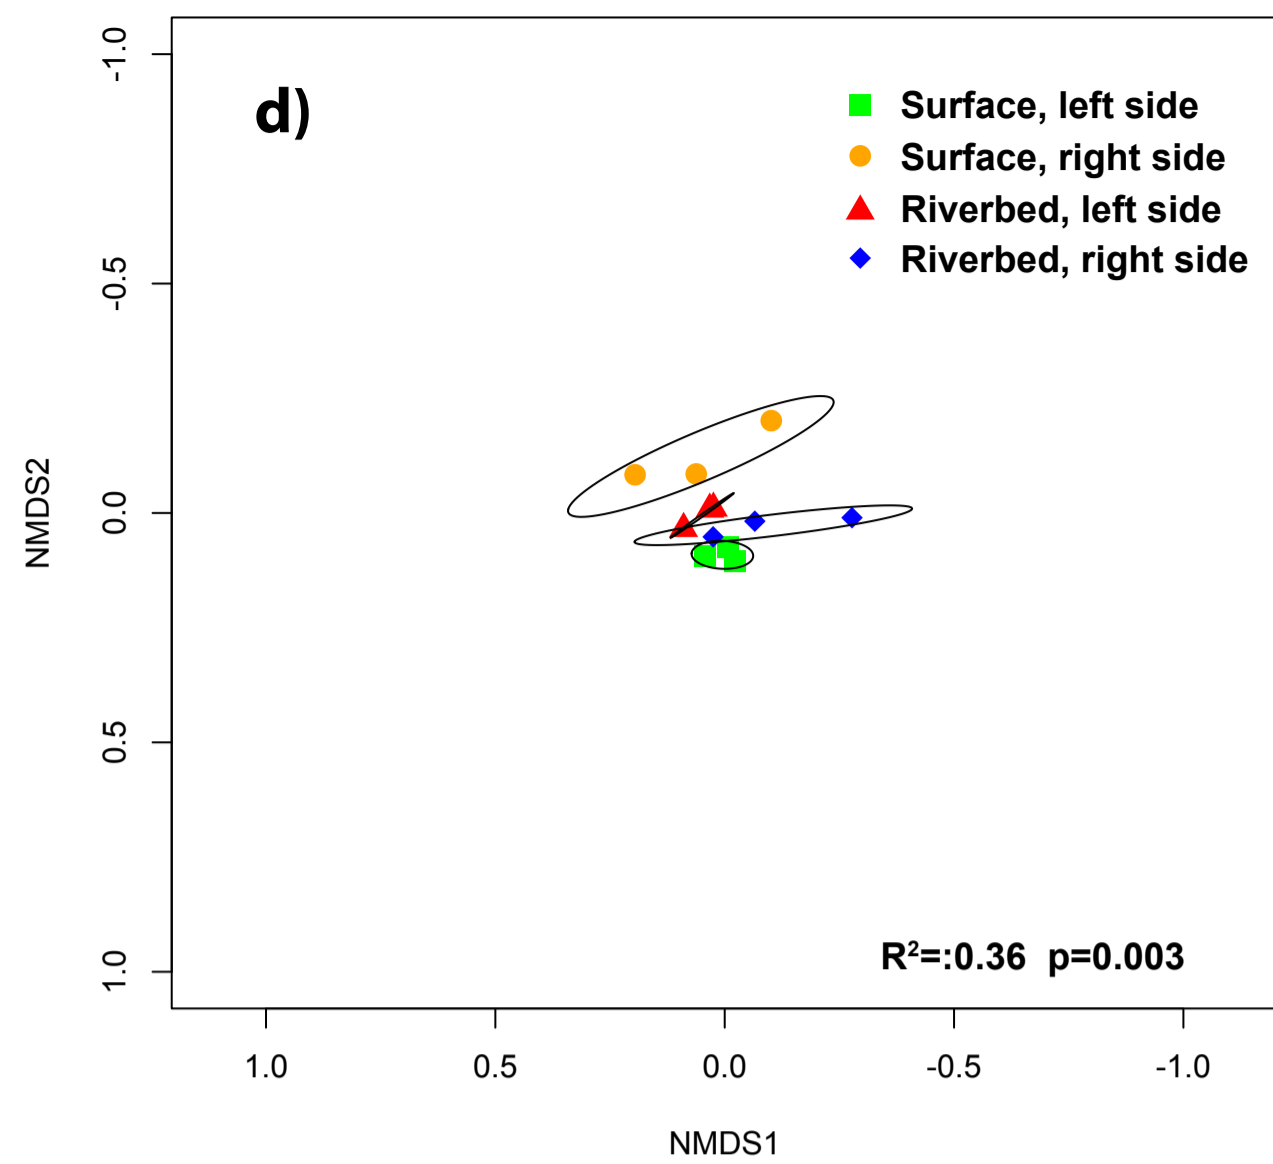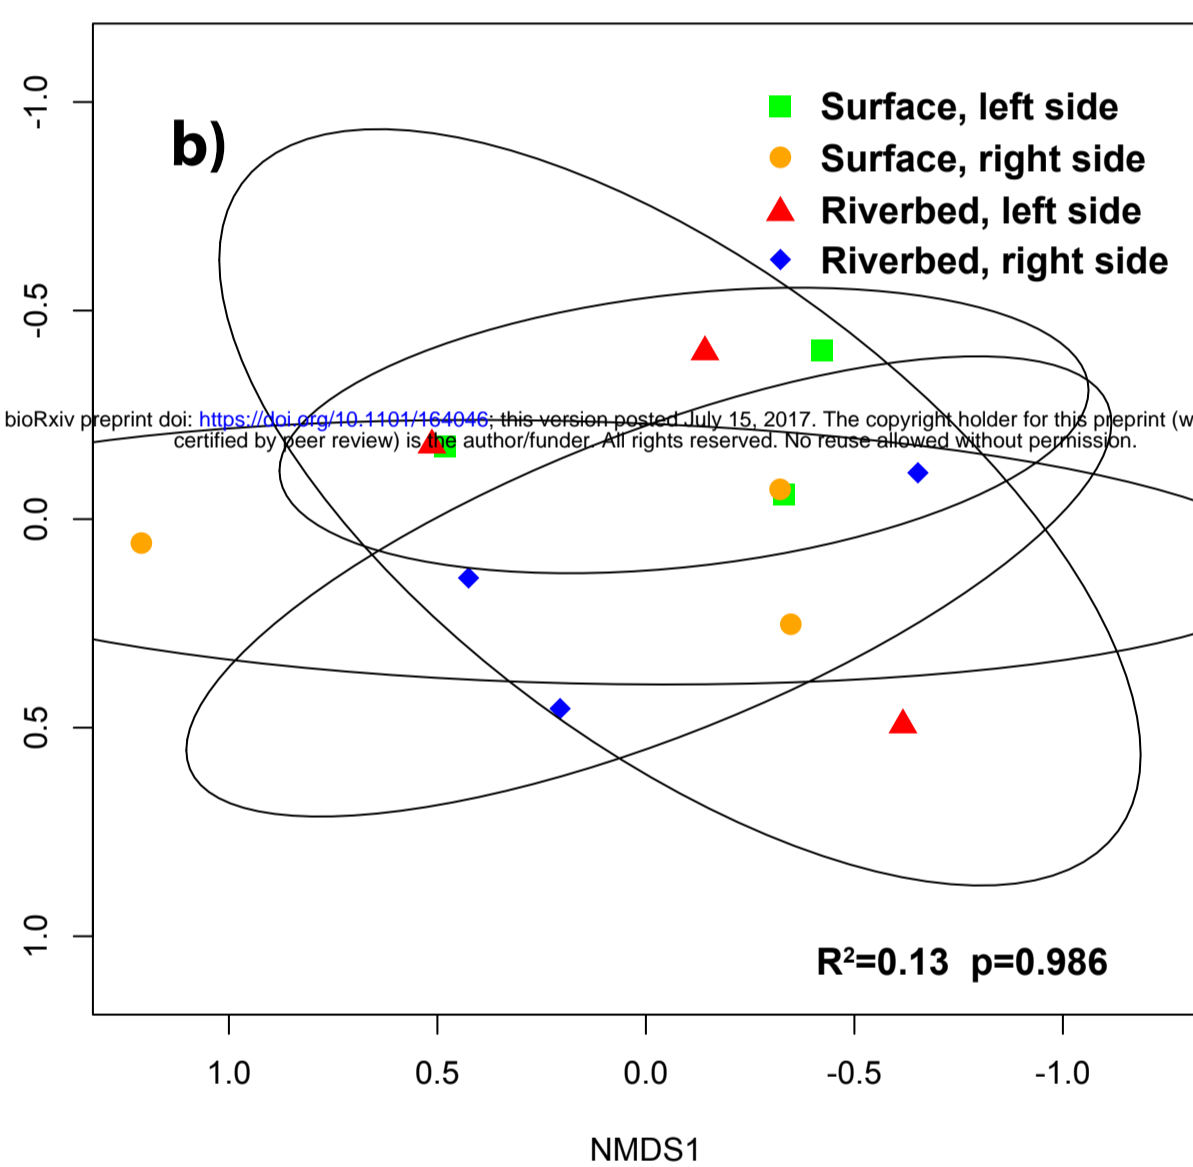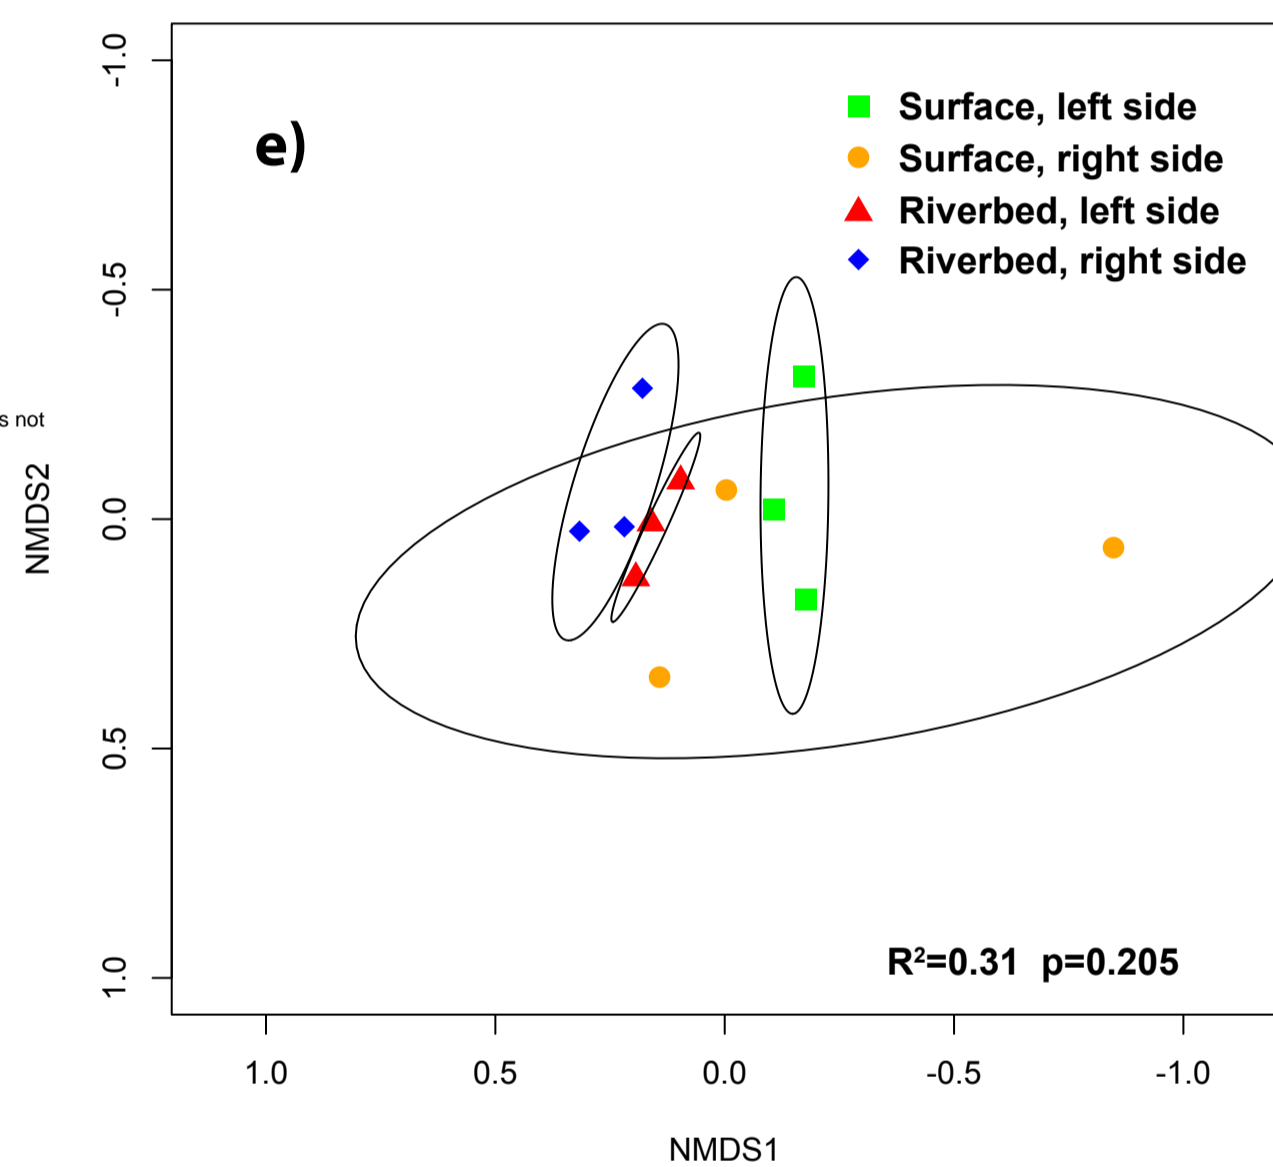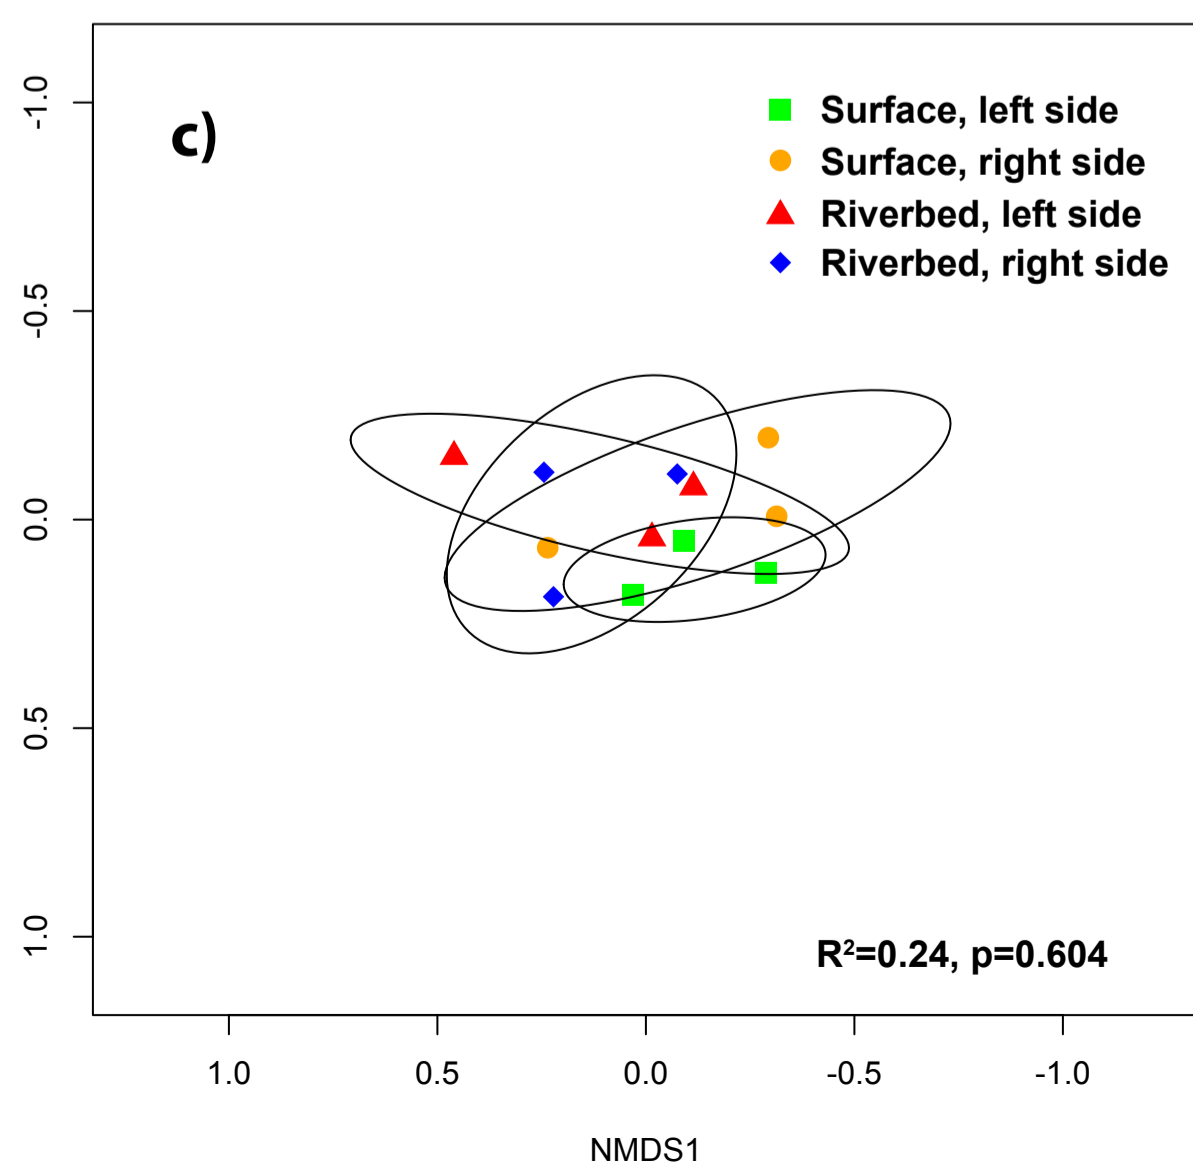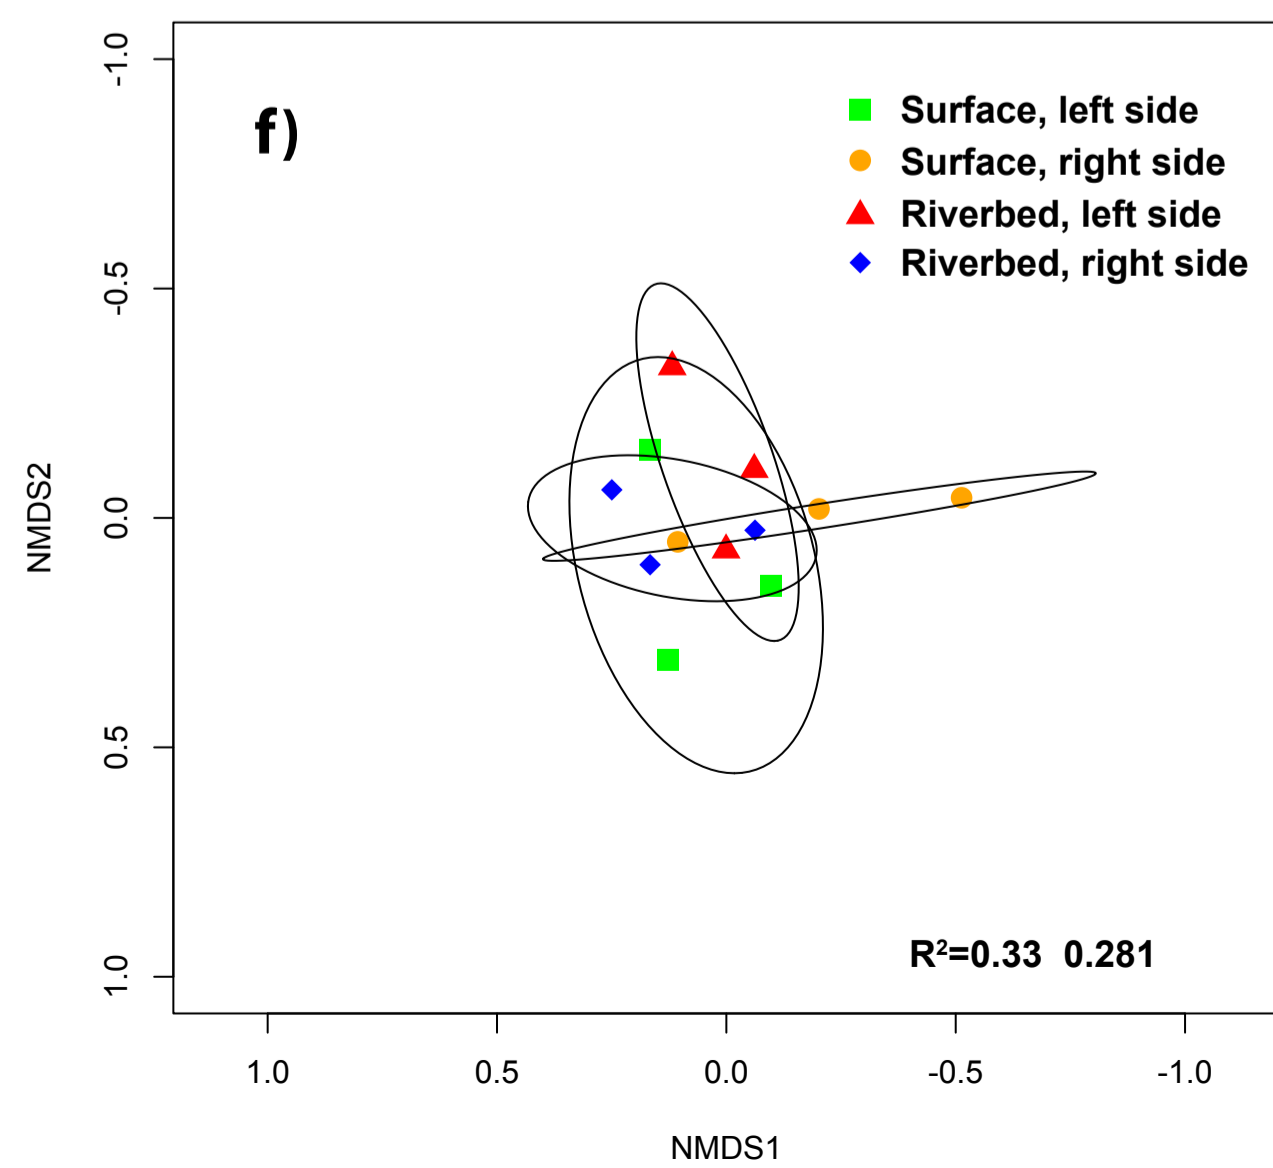

**a)****Gillbach**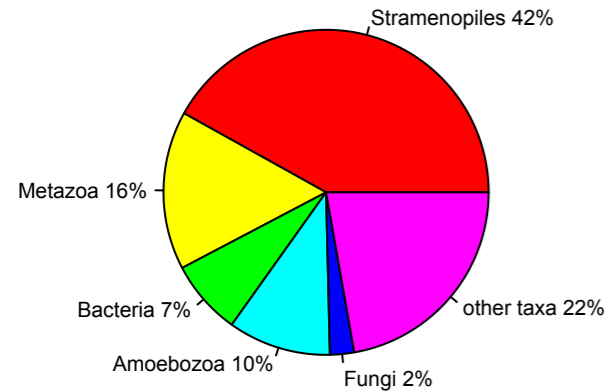**b)****Möhne**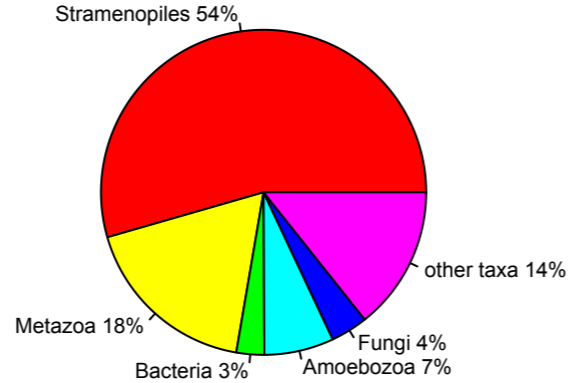**c)****Ruhr (spring)**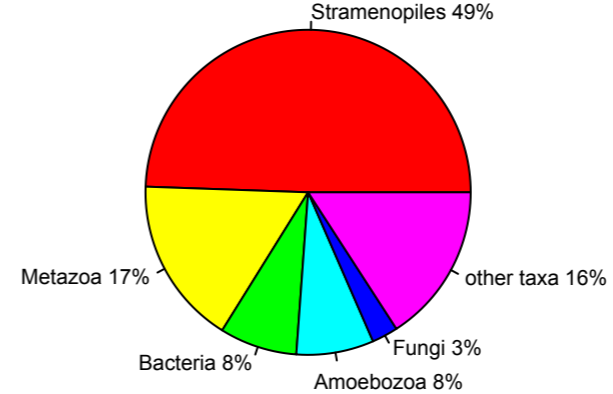**d)****Ruhr (autumn)**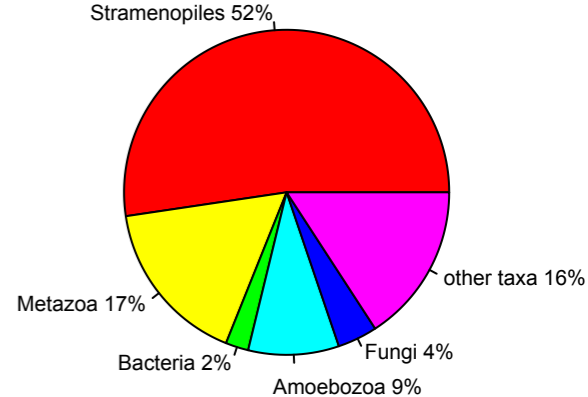

### All OTUs

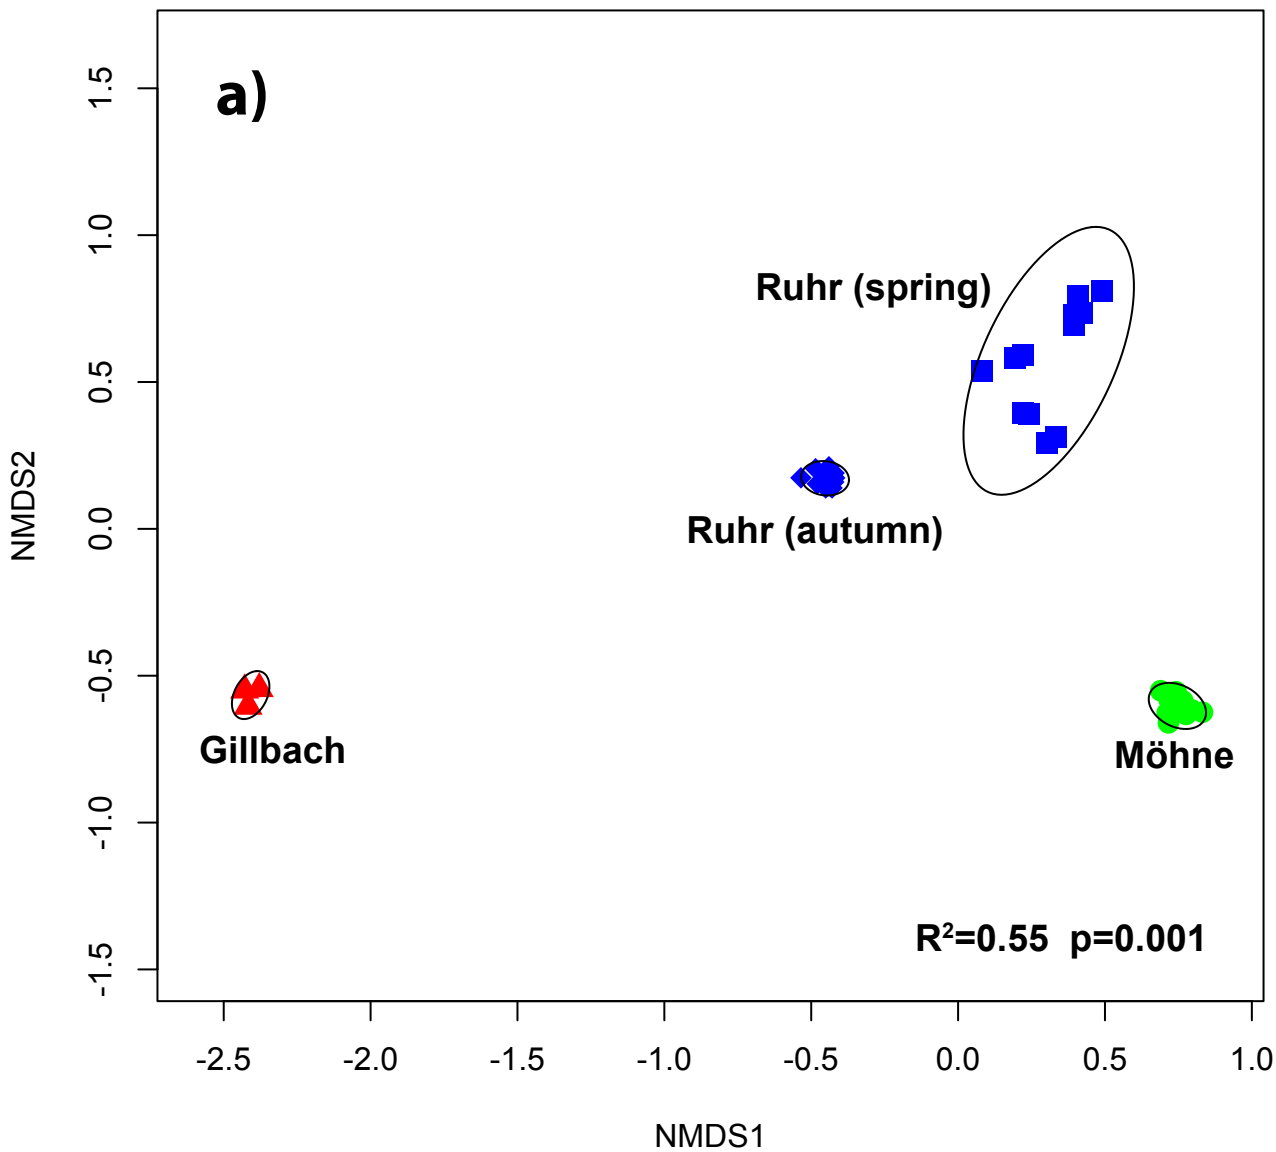

### Metazoa

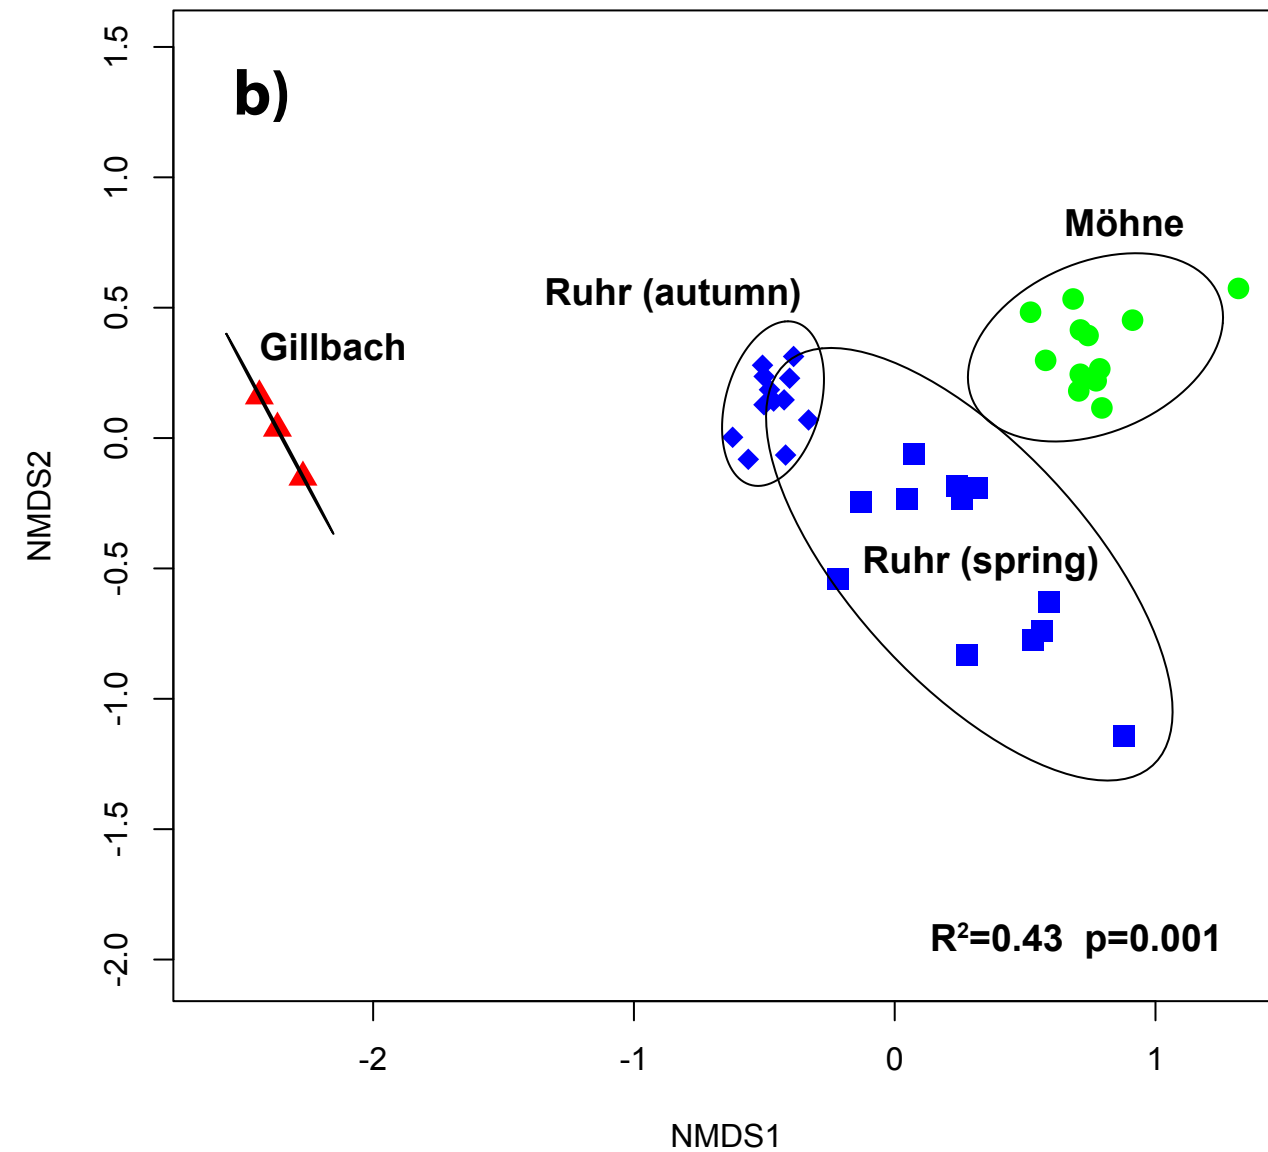

### Stramenopiles

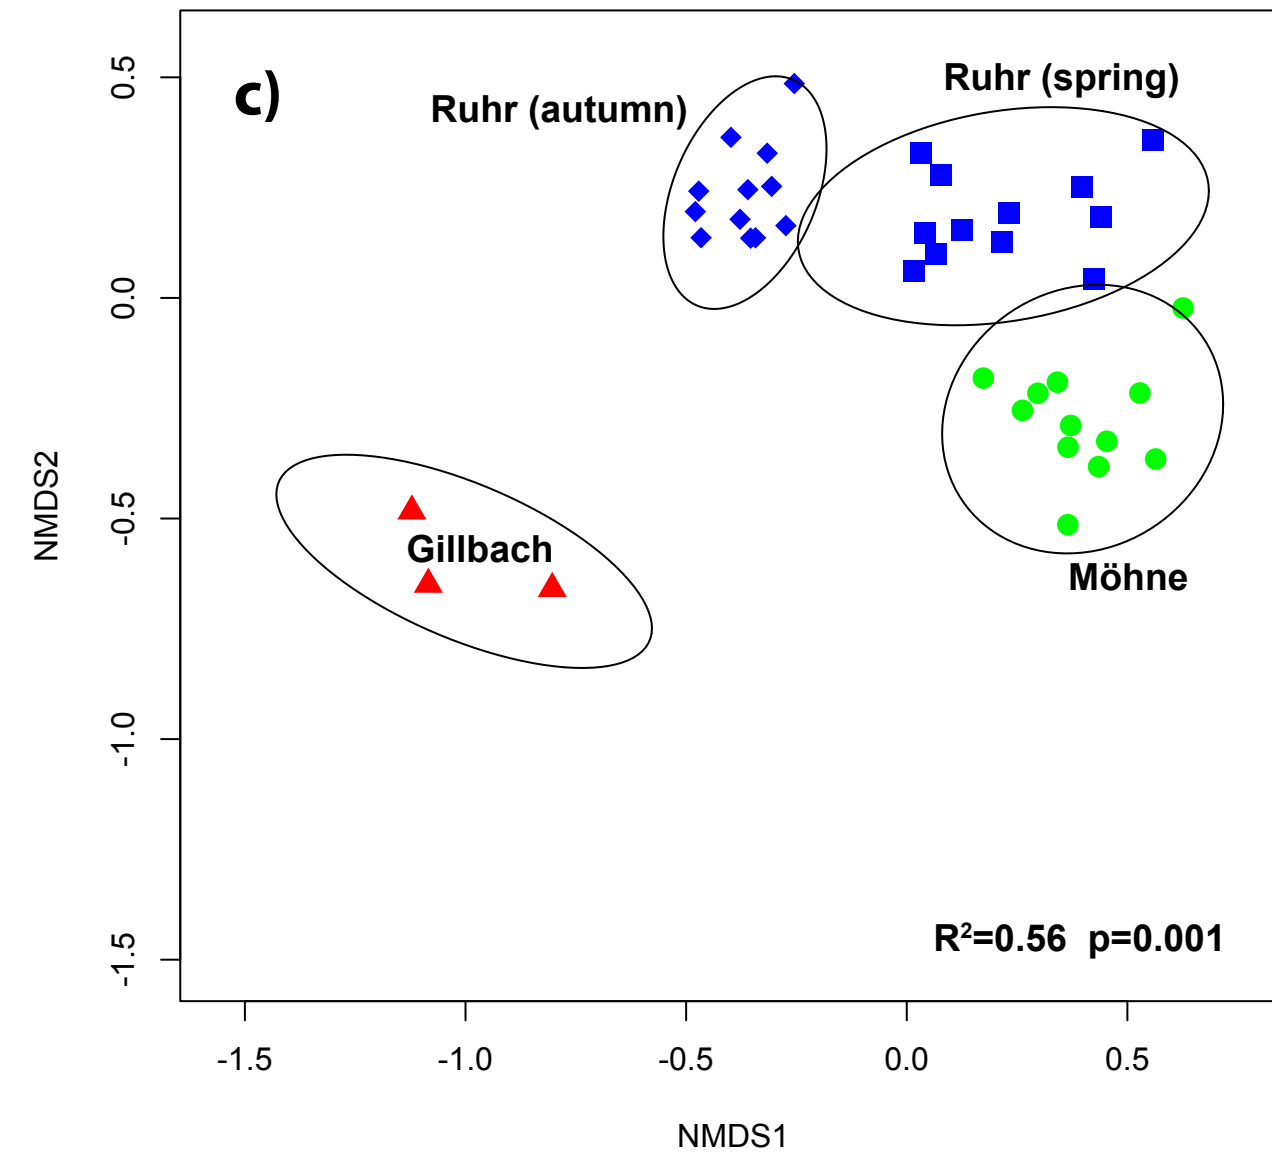

Source: https://www.biorxiv.org/content/10.1101/164046v1.full.pdf
